# Supplementary material
Source: PubMed Central journal article supplement (PMC5705772)
Supplement: 41593_2017_14_MOESM1_ESM.pdf [file 41593_2017_14_MOESM1_ESM.pdf]

In the format provided by the authors and unedited.

# Oxytocin-receptor-expressing neurons in the parabrachial nucleus regulate fluid intake

Philip J. Ryan <sup>1,2,3\*</sup>, Silvano I. Ross<sup>1,2</sup>, Carlos A. Campos<sup>1,2</sup>, Victor A. Derkach<sup>1,2</sup> and Richard D. Palmiter <sup>1,2\*</sup>

---

<sup>1</sup>Howard Hughes Medical Institute, University of Washington, Seattle, Washington, USA. <sup>2</sup>Department of Biochemistry, University of Washington, Seattle, Washington, USA. <sup>3</sup>The Florey Institute of Neuroscience and Mental Health, University of Melbourne, Parkville, Victoria, Australia.

\*e-mail: [philip.ryan@florey.edu.au](mailto:philip.ryan@florey.edu.au); [palmiter@uw.edu](mailto:palmiter@uw.edu)

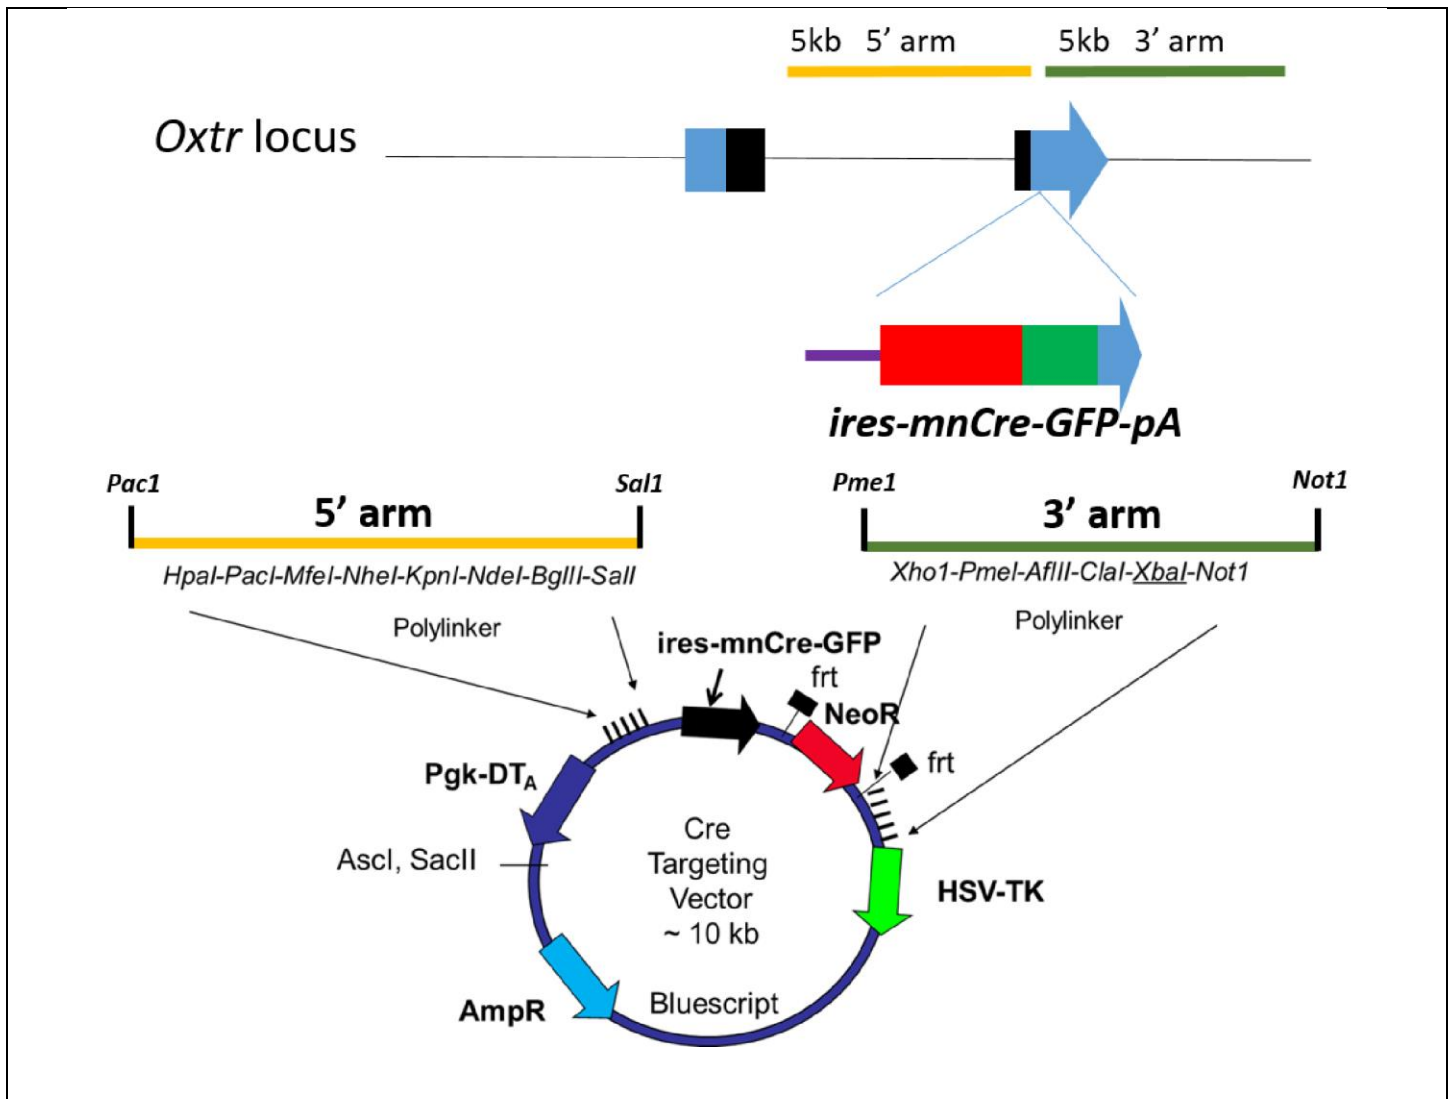

Supplementary Figure 1

Generation of *Oxtr<sup>Cre:GFP</sup>* mice.

Diagram showing: top, insertion of *ires-mnCre:GFP* construct just 3' of the termination codon of the *Oxtr* gene; bottom, the targeting vector. Some key restriction enzymes sites used for cloning are shown. See Methods for details.

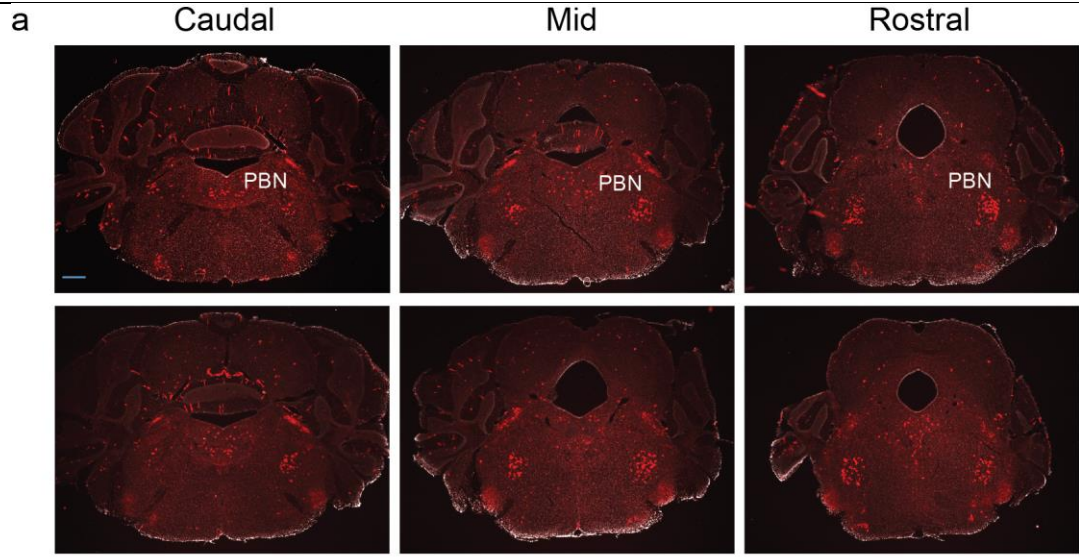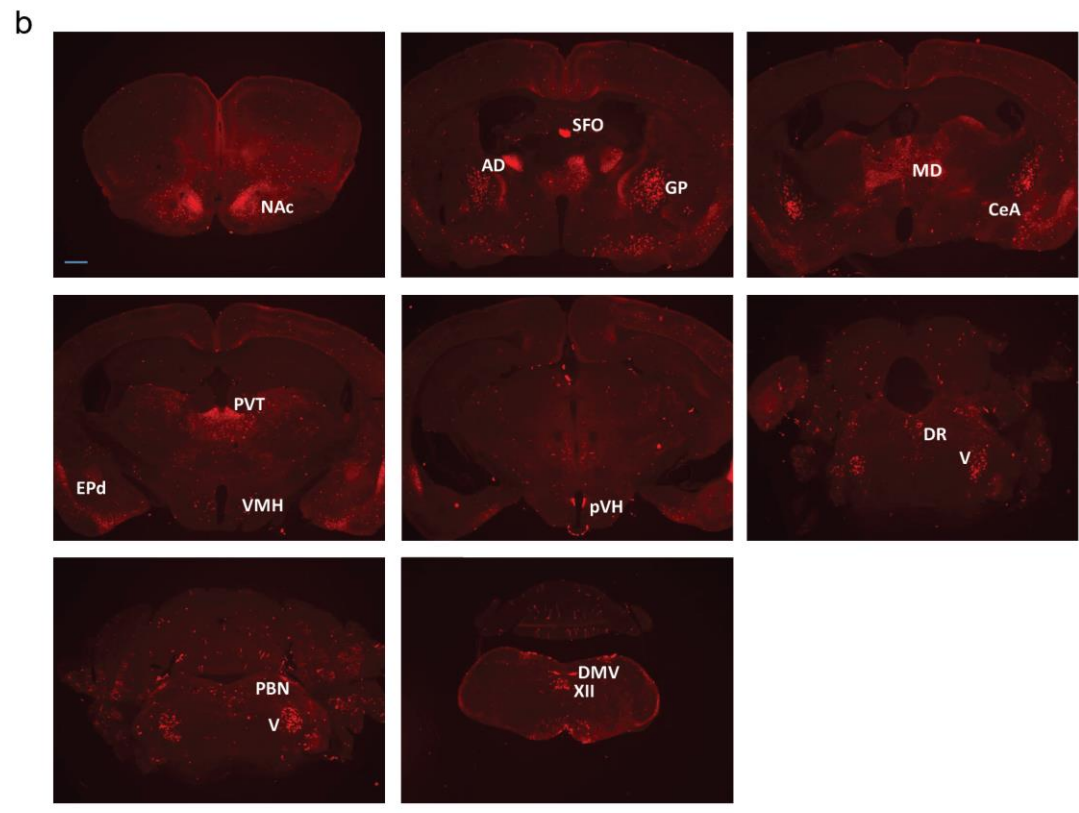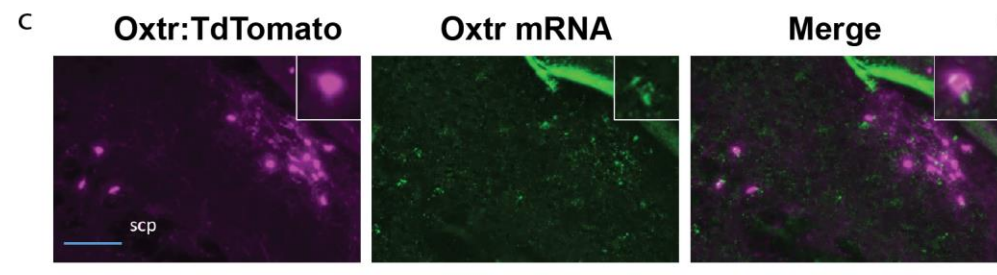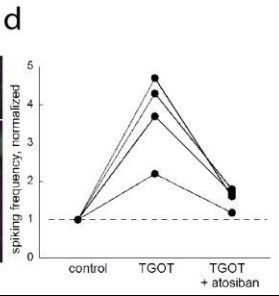

## Supplementary Figure 2

### Oxytocin receptor expression in the parabrachial nucleus.

(a) Coronal sections 90  $\mu\text{m}$  apart from *Oxtr*<sup>Cre/+</sup>::Ai14 mouse demonstrating oxytocin receptor (Oxtr) expression in the parabrachial nucleus (PBN) from bregma -5.1 to -5.5; scale bar, 500  $\mu\text{m}$ . (b) Selection of brain images demonstrating robust Oxtr expression; AD, anterodorsal thalamic nucleus; CeA, central nucleus of amygdala; EPd, dorsal endopiriform nucleus; DMV, dorsal motor nucleus of the vagus; DR, dorsal raphé nucleus; GP, globus pallidus; XII, hypoglossal nucleus; MD, mediodorsal thalamic nucleus; NAc, nucleus accumbens; PBN, parabrachial nucleus; PVT, paraventricular thalamic nucleus; pVH, periventricular nucleus of the hypothalamus; SFO, subfornical organ; V, trigeminal motor nucleus; VMH, ventromedial hypothalamic nucleus; scale bar, 500  $\mu\text{m}$  ( $n = 3$ ). (c) Representative RNAscope® image of PBN demonstrating co-expression of *Oxtr* mRNA in  $80 \pm 3\%$  Oxtr:TdTomato-expressing neurons ( $n = 3$ ). Scale bar, 100  $\mu\text{m}$ ; scp, superior cerebellar peduncle. (d) Oxtr agonist, TGOT, increased spiking frequency in Oxtr<sup>PBN</sup> neurons by  $3.7 \pm 0.55$ -fold, which was inhibited by Oxtr antagonist, atosiban to  $1.6 \pm 0.14$  fold ( $n = 4/4$  Oxtr<sup>PBN</sup> neurons). Data were normalized to spiking frequency prior to TGOT application.

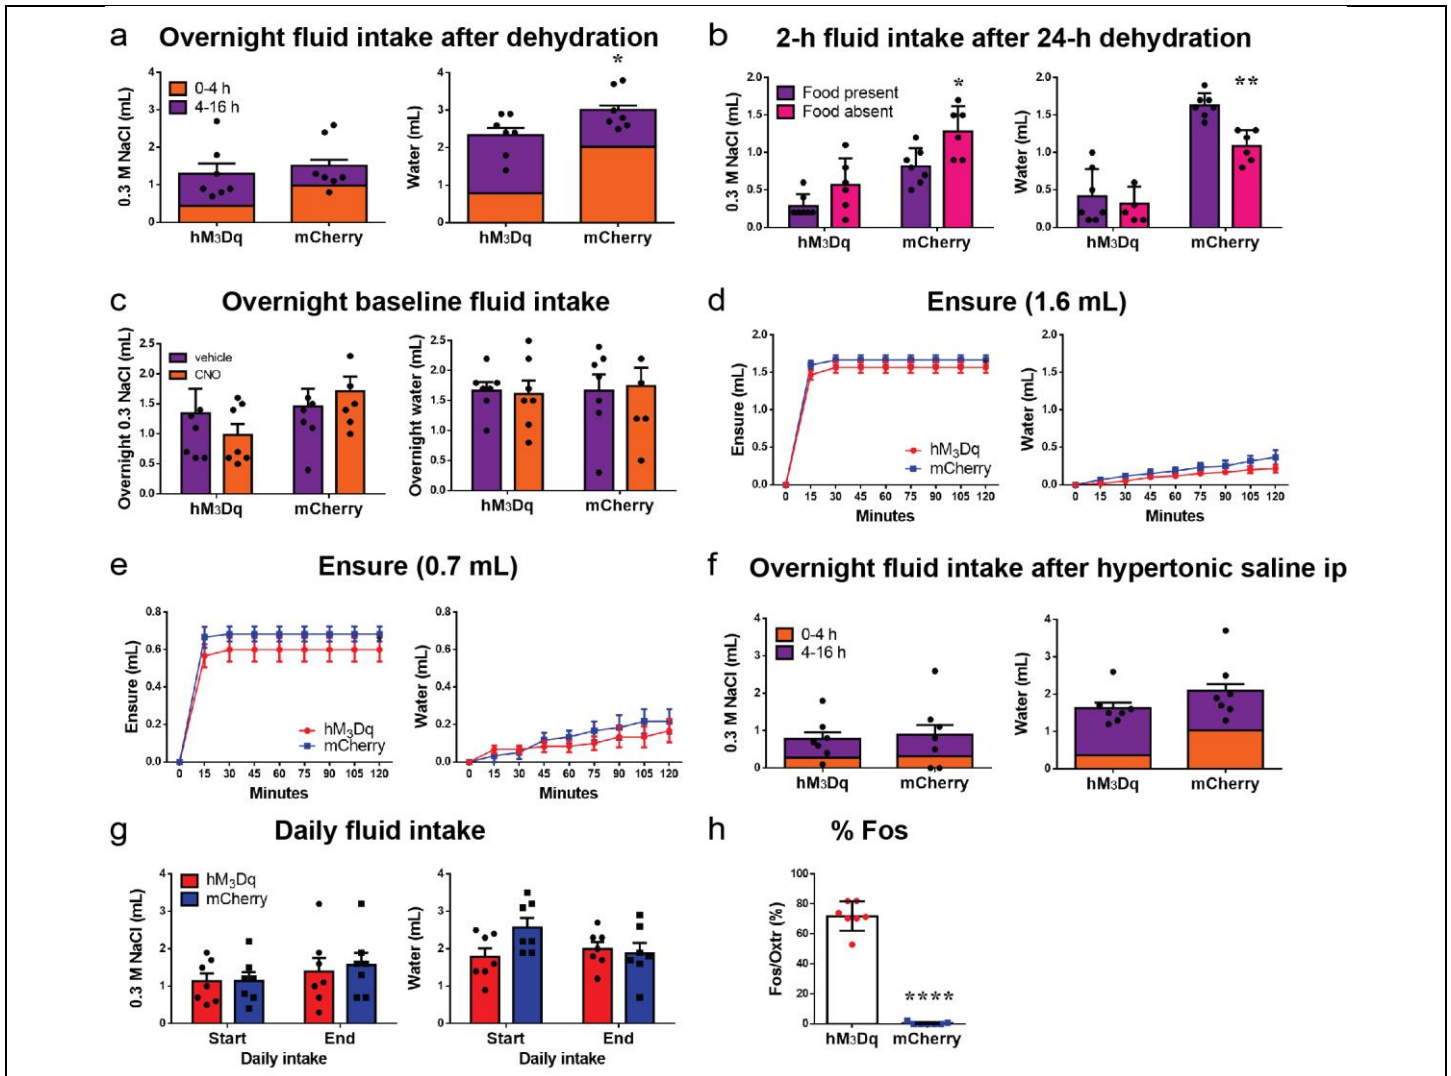

**Supplementary Figure 3**

**Chemogenetic activation of  $Oxt^{PBN}$  neurons decreases fluid intake acutely.**

(a) Overnight NaCl was not significantly different, but overnight water intake remained slightly decreased following CNO injection in hM<sub>3</sub>Dq-injected vs control mCherry-injected mice after 24-h dehydration ( $n = 7$ /group; unpaired 2-tailed Student's t-test; NaCl:  $t(12) = 0.5656$ ;  $p = 0.5821$ ; water:  $t(12) = 2.311$ ;  $p = 0.0394$ ). (b) Control mCherry-injected mice consumed more NaCl and less water when food was absent; but there was no significant difference in fluid intake after CNO injection in hM<sub>3</sub>Dq-injected mice ( $n = 7$ /group in food present; 6/group in food absent; 2-way ANOVA; NaCl: interaction  $F(1,22) = 0.7401$ ;  $p = 0.3989$ ; main effect of viral genotype  $F(1,22) = 32.44$ ;  $p < 0.0001$ ; main effect of food availability  $F(1,22) = 11.77$ ;  $p = 0.0024$ ; water: interaction  $F(1,22) = 4.946$ ;  $p = 0.0367$ ). (c) Overnight baseline fluid intake was not significantly different following vehicle or CNO injection ( $n = 7$ /group; 2-way RM ANOVA; NaCl: interaction  $F(1,12) = 1.806$ ;  $p = 0.2038$ ; water: interaction  $F(1,12) = 0.1977$ ;  $p = 0.6645$ ). **d,e**, Acute  $Oxt^{PBN}$  activation demonstrated no significant difference in Ensure or water intake when Ensure was limited to (d) ~1.6 mL ( $n = 6$ /group; 2-way RM ANOVA; Ensure: interaction  $F(8,80) = 1.168$ ;  $p = 0.3285$ ; water: interaction  $F(8,80) = 1.027$ ;  $p = 0.4228$ ) or (e) ~0.7 mL ( $n = 6$ /group; 2-way RM ANOVA; Ensure: interaction  $F(8,80) = 1.182$ ;  $p = 0.3202$ ; water: interaction  $F(8,80) = 1.313$ ;  $p = 0.2489$ ). (f) Overnight fluid intake was not significantly different after hypertonic saline ip injection in hM<sub>3</sub>Dq- or vs mCherry-injected mice ( $n = 7$ /group; unpaired 2-tailed Student's t-test; NaCl:  $t(12) = 0.2868$ ;  $p = 0.7791$ ; water:  $t(12) = 1.354$ ;  $p = 0.2008$ ). (g) Daily intake of NaCl and water was not significantly different between the start and end of experimentation ( $n = 7$ /group; 2-way RM ANOVA; NaCl: interaction  $F(1,12) = 0.1273$ ;  $p = 0.7275$ ; water: interaction:  $F(1,12) = 4.243$ ;  $p = 0.0618$ ). (h) Percentage Fos in  $Oxt^{PBN}$  neurons in hM<sub>3</sub>Dq-injected vs mCherry-injected  $Oxt^{Cre/4}$  mice ( $n = 7$ /group; unpaired 2-tailed Student's t-test;  $t(12) = 19.28$ ;  $p < 0.0001$ ). Data expressed as mean  $\pm$  s.e.m. \*\*\*\* $p < 0.0001$ ; \*\* $p < 0.01$ ; \* $p < 0.05$ . See Supplementary Information for statistical analyses.

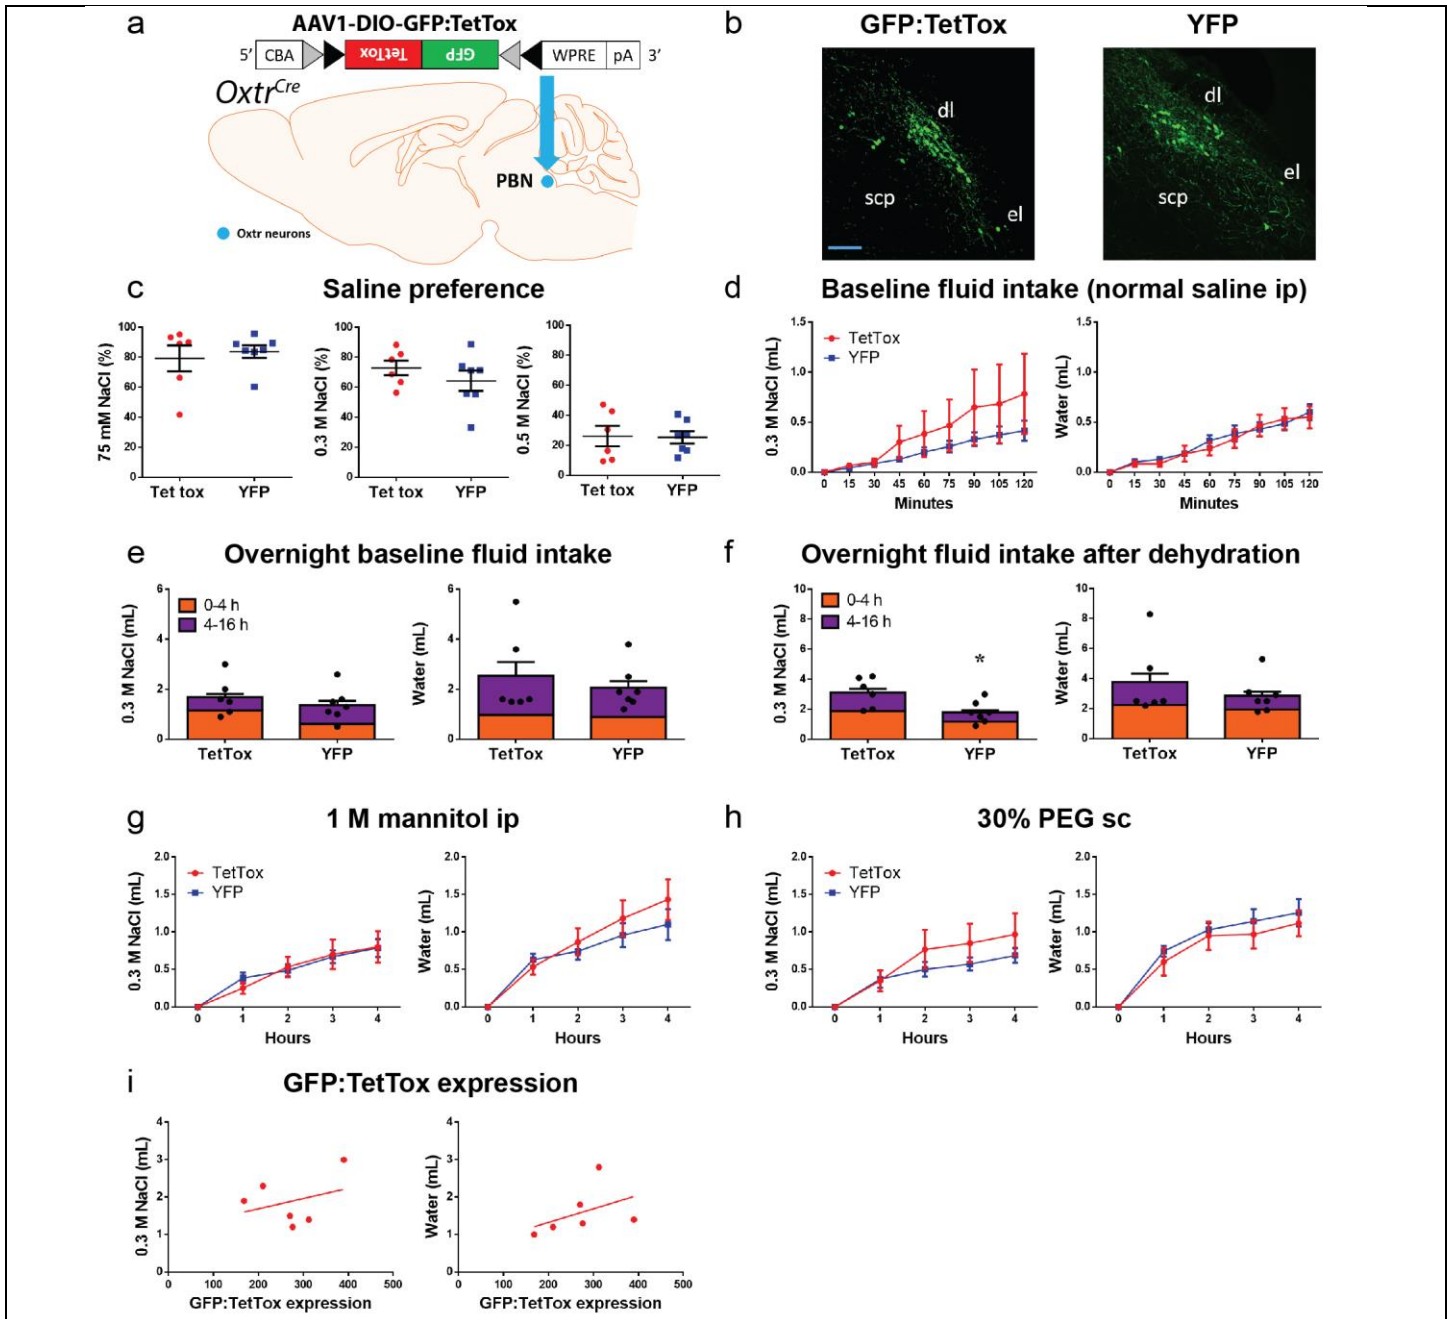

#### Supplementary Figure 4

#### Chronic *Oxt<sup>PBN</sup>* neuron inactivation does not affect fluid intake at baseline or following various homeostatic challenges.

(a) Injection of AAV-DIO-GFP:TetTox in *Oxt<sup>PBN</sup>* neurons. (b) Representative images of GFP expression in *Oxt<sup>PBN</sup>* neurons in GFP:TetTox- vs control YFP-injected mice; scp, superior cerebellar peduncle; dl, dorsolateral; el, external lateral; scale bar 100  $\mu$ m. (c) Chronic *Oxt<sup>PBN</sup>* inactivation does not significantly alter baseline saline preference at different concentrations (0.075, 0.3, 0.5 M) ( $n = 6$  TetTox, 7 YFP; unpaired 2-tailed Student's t-test; 0.075 M NaCl:  $t(11) = 0.4967$ ;  $p = 0.6292$ ; 0.3 M NaCl:  $t(11) = 1.005$ ;  $p = 0.3364$ ; 0.5 M NaCl:  $t(11) = 0.09961$ ;  $p = 0.9224$ ), and does not significantly change fluid intake following normal saline ip, either (d) acutely ( $n = 6$  TetTox, 7 YFP; 2-way RM ANOVA; NaCl: interaction  $F(8,88) = 0.7729$ ;  $p = 0.6275$ ; water: interaction  $F(8,88) = 0.4721$ ;  $p = 0.8728$ ) or (e) overnight ( $n = 6$  TetTox, 7 YFP; unpaired 2-tailed Student's t-test; NaCl:  $t(11) = 0.8014$ ;  $p = 0.4398$ ; water:  $t(11) = 0.6858$ ;  $p = 0.5070$ ). (f) Overnight NaCl intake remained significantly increased in TetTox-injected mice ( $n = 6$  TetTox, 7 YFP; unpaired 2-tailed Student's t-test; NaCl:  $t(11) = 2.760$ ;  $p = 0.0186$ ; water:  $t(11) = 0.8881$ ;  $p = 0.3935$ ). Chronic *Oxt<sup>PBN</sup>* inactivation does not significantly

change fluid intake following (g) 1 M mannitol ip ( $n = 6$  TetTox; 7 YFP; 2-way RM ANOVA; NaCl: interaction  $F(4,44) = 0.4638$ ;  $p = 0.7619$ ; water: interaction  $F(4,44) = 1.524$ ;  $p = 0.2118$ ) or (h) 30% PEG sc ( $n = 6$  TetTox; 7 YFP; 2-way RM ANOVA; NaCl: interaction  $F(4,44) = 1.494$ ;  $p = 0.2203$ ; water: interaction  $F(4,44) = 0.3461$ ;  $p = 0.8453$ ). (i) There was no significant correlation between the level of GFP:TetTox expression and the amount of fluid intake after 24-h dehydration ( $n = 6$ ; Pearson product-moment correlation; NaCl:  $r = 0.3167$ ;  $p = 0.5408$ ; water:  $r = 0.4335$ ;  $p = 0.3905$ ). Data are expressed as mean  $\pm$  s.e.m. \* $p < 0.05$ . See Supplementary Information for statistical analyses.

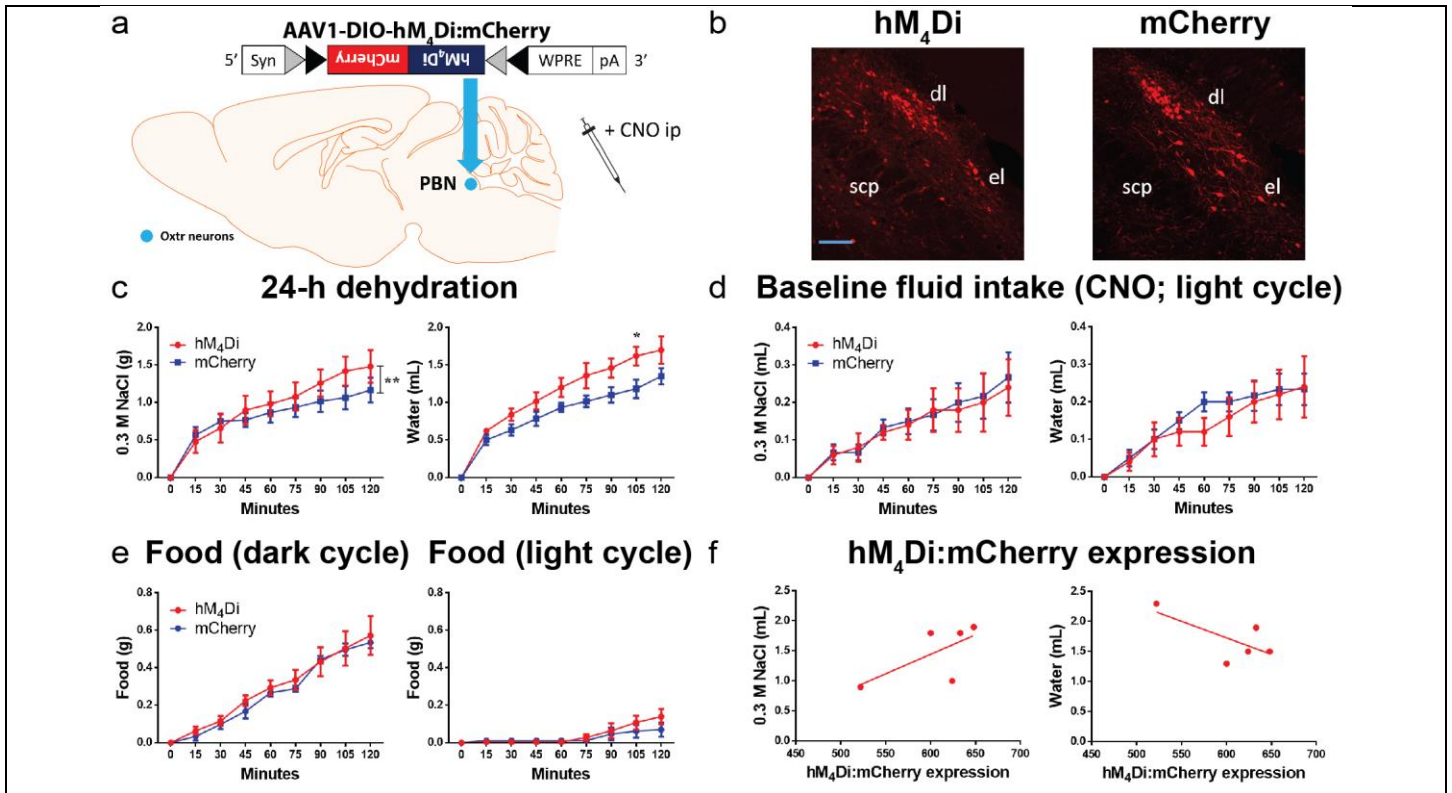

**Supplementary Figure 5**

**Acute Otr<sup>PBN</sup> neuron inhibition increases fluid intake after dehydration, but does not affect baseline food or fluid intake.**

(a) Injection of AAV1-DIO-hM<sub>4</sub>Di:mCherry in Otr<sup>PBN</sup> neurons. (b) Representative images of hM<sub>4</sub>Di and mCherry expression in Otr<sup>PBN</sup> neurons; scp, superior cerebellar peduncle; dl, dorsolateral; el, external lateral; scale bar 100 μm. (c) Acute Otr<sup>PBN</sup> inhibition increases NaCl and water intake following 24-h dehydration ( $n = 5$  hM<sub>4</sub>Di, 6 mCherry; 2-way RM ANOVA; NaCl: interaction  $F(8,72) = 2.962$ ;  $p = 0.0064$ ; water: interaction  $F(8,72) = 2.289$ ;  $p = 0.0304$ ), but (d) does not significantly alter fluid intake at baseline during the light cycle ( $n = 5$  hM<sub>4</sub>Di, 6 mCherry; 2-way RM ANOVA; NaCl: interaction  $F(8,72) = 0.1264$ ;  $p = 0.9979$ ; water: interaction  $F(8,72) = 0.6017$ ;  $p = 0.7734$ ). (e) Otr<sup>PBN</sup> inhibition does not significantly alter food intake during the dark or light cycle ( $n = 5$  hM<sub>4</sub>Di, 6 mCherry; 2-way RM ANOVA; baseline food: interaction  $F(8,72) = 0.2429$ ;  $p = 0.9811$ ; post 24-h fast: interaction  $F(8,72) = 1.040$ ;  $p = 0.4510$ ). (f) There was no significant correlation between the level of hM<sub>4</sub>Di:mCherry expression and the amount of fluid intake after 24-h dehydration ( $n = 5$ ; Pearson product-moment correlation; NaCl:  $r = 0.6649$ ;  $p = 0.2208$ ; water:  $r = -0.6857$ ;  $p = 0.2013$ ). Data are expressed as mean ± s.e.m. \*\* $p < 0.01$ ; \* $p < 0.05$ . See Supplementary Information for statistical analyses.



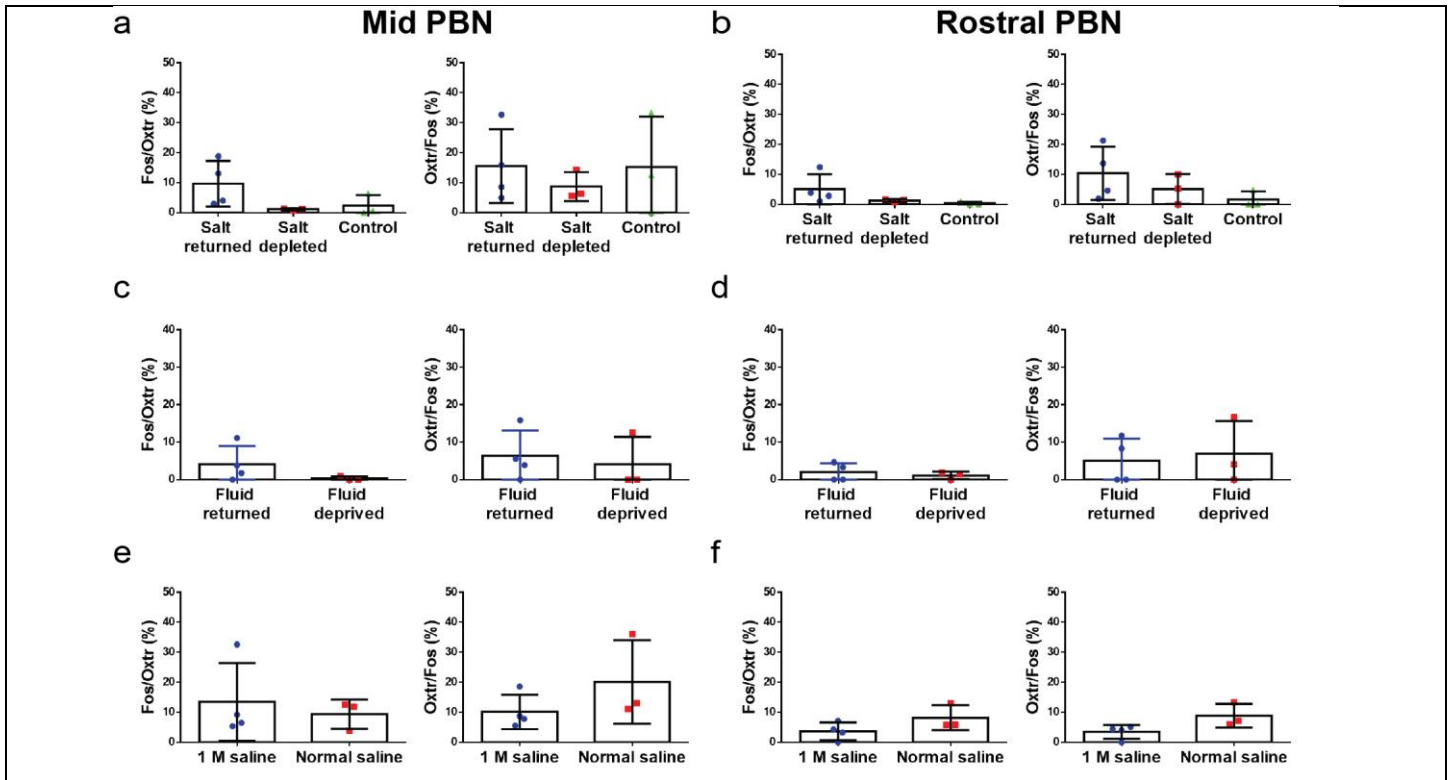

**Supplementary Figure 6**

**Oxtr<sup>PBN</sup> neurons in mid and rostral PBN show no significant difference in Fos expression.**

**a,c,e**, Quantification of mid Oxtr<sup>PBN</sup> co-expression of Fos and Oxtr in **(a)** salt depletion ( $n = 4$  salt returned, 4 salt depleted, 3 control; 1-way ANOVA; Fos/Oxtr: interaction  $F(2,7) = 2.727$ ;  $p = 0.1331$ ; Oxtr/Fos: interaction  $F(2,7) = 0.3097$ ;  $p = 0.7432$ ), **(c)** fluid deprivation ( $n = 4$  fluid returned, 3 fluid deprived; unpaired 2-tailed Student's t-test; Fos/Oxtr:  $t(5) = 1.335$ ;  $p = 0.2394$ ; Oxtr/Fos:  $t(5) = 0.4049$ ;  $p = 0.7023$ ) and **(e)** and hypertonic saline experiments ( $n = 4$  for 1 M saline, 3 normal saline; unpaired 2-tailed Student's t-test; Fos/Oxtr:  $t(5) = 0.5084$ ;  $p = 0.6328$ ; Oxtr/Fos:  $t(5) = 1.319$ ;  $p = 0.2444$ ). **b,d,f**, Quantification of rostral Oxtr<sup>PBN</sup> co-expression of Fos and Oxtr in **(b)** salt depletion ( $n = 4$  salt returned, 4 salt depleted, 3 control; 1-way ANOVA; Fos/Oxtr: interaction  $F(2,7) = 2.008$ ;  $p = 0.2046$ ; Oxtr/Fos: interaction  $F(2,7) = 1.582$ ;  $p = 0.2711$ ), **(d)** fluid deprivation ( $n = 4$  fluid returned, 3 fluid deprived; unpaired 2-tailed Student's t-test; Fos/Oxtr:  $t(5) = 0.5977$ ;  $p = 0.5761$ ; Oxtr/Fos:  $t(5) = 0.3396$ ;  $p = 0.7479$ ) and **(f)** and hypertonic saline ( $n = 4$  for 1 M saline, 3 normal saline; unpaired 2-tailed Student's t-test; Fos/Oxtr:  $t(5) = 1.716$ ;  $p = 0.1469$ ; Oxtr/Fos:  $t(5) = 2.300$ ;  $p = 0.0698$ ). Data are expressed as mean  $\pm$  s.e.m. See Supplementary Information for statistical analyses.

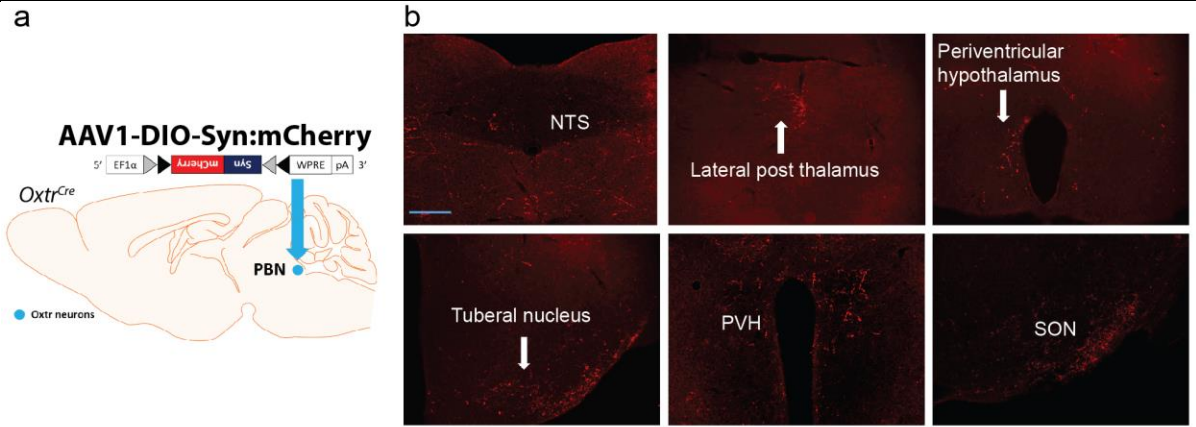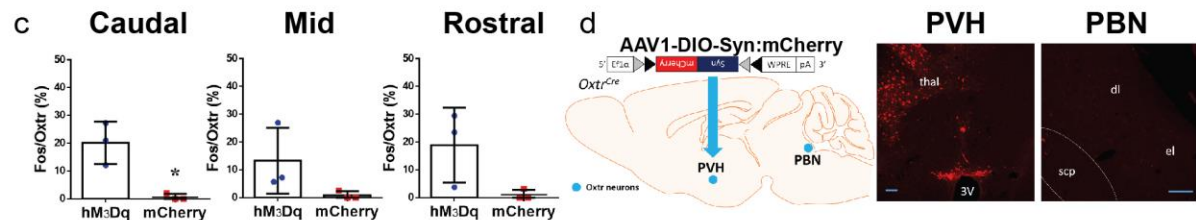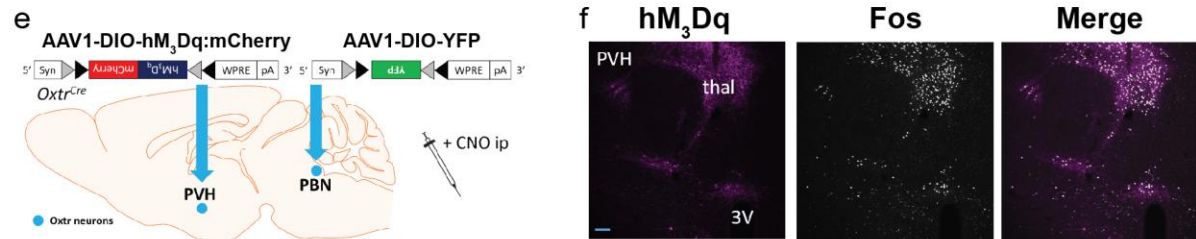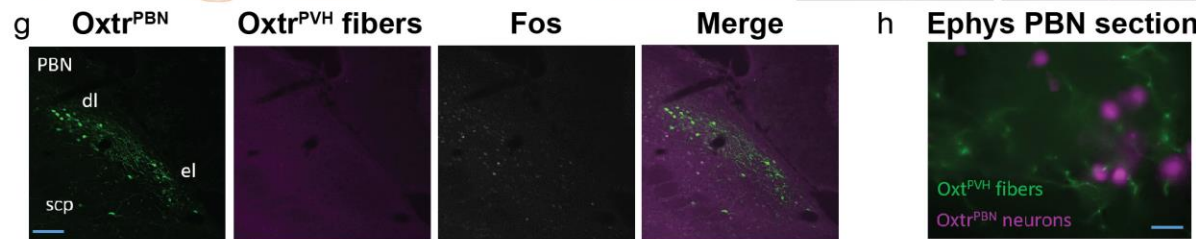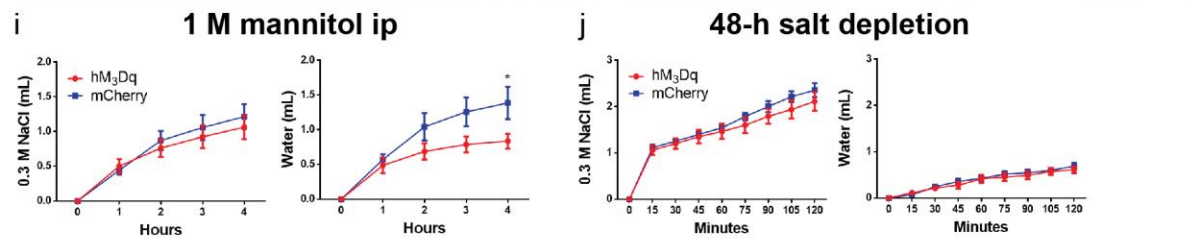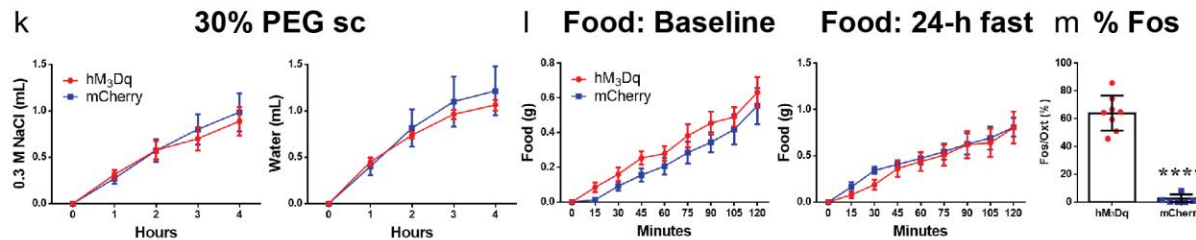

## Supplementary Figure 7

### Downstream and upstream projections of Oxt<sup>PBN</sup> neurons.

(a) Injection of AAV-DIO-synaptophysin:mCherry in Oxt<sup>PBN</sup> neurons demonstrates less prominent downstream projections to (b) the nucleus of the solitary tract (NTS), lateral posterior thalamus, periventricular hypothalamus, tuberal nucleus, paraventricular nucleus of the hypothalamus (PVH) and supraoptic nucleus (SON); ( $n = 2$ ) scale bar, 200  $\mu\text{m}$ . (c) Percentage Fos in caudal, mid and rostral Oxt<sup>PBN</sup> neurons in  $Oxt^{Cre/+}::Oxt^{Cre/+}$  mice injected with hM<sub>3</sub>Dq or mCherry in PVH ( $n = 3/\text{group}$ ; unpaired 2-tailed Student's t-test; caudal:  $t(4) = 4.385$ ;  $p = 0.0118$ ; mid:  $t(4) = 1.807$ ;  $p = 0.1451$ ; rostral:  $t(4) = 2.278$ ;  $p = 0.0850$ ). (d) Injection of AAV1-DIO-synaptophysin:mCherry in PVH of  $Oxt^{Cre/+}$  mice demonstrates no visible projections in PBN ( $n = 3$ ); 3V, third ventricle; thal, thalamic nuclei; scp, superior cerebellar peduncle; dl, dorsolateral PBN; el, external lateral PBN; scale bar, 100  $\mu\text{m}$ . (e) Injection of AAV-DIO-hM<sub>3</sub>Dq into the PVH and AAV-DIO-YFP into the PBN of  $Oxt^{Cre/+}$  mice. (f) Following CNO, Fos is robustly expressed in the PVH and thalamus, but (g) there was minimal expression in the PBN ( $n = 3$ ). (h) Representative live image of the lateral PBN prior to electrophysiological recordings demonstrating Oxt<sup>PVH</sup> fibers and Oxt<sup>PBN</sup> neurons; scale bar, 200  $\mu\text{m}$ . (i) Acute Oxt<sup>PVH</sup> stimulation decreases water intake following 1 M mannitol ip ( $n = 7$  hM<sub>3</sub>Dq, 8 mCherry; 2-way RM ANOVA; NaCl: interaction  $F(4,52) = 0.6187$ ;  $p = 0.6512$ ; water: interaction  $F(4,52) = 4.120$ ;  $p = 0.0057$ ), but (j) does not significantly alter fluid intake following 48-h salt appetite ( $n = 7$  hM<sub>3</sub>Dq, 8 mCherry; 2-way RM ANOVA; NaCl: interaction  $F(8,104) = 1.056$ ;  $p = 0.3999$ ; water: interaction  $F(8,104) = 0.6962$ ;  $p = 0.6941$ ) or (k) 30% PEG sc ( $n = 7$  hM<sub>3</sub>Dq, 8 mCherry; 2-way RM ANOVA; NaCl: interaction  $F(4,52) = 0.3265$ ;  $p = 0.8589$ ; water: interaction  $F(4,52) = 0.5231$ ;  $p = 0.7191$ ), or (l) food intake at baseline or after a 24-h fast ( $n = 7$  hM<sub>3</sub>Dq, 8 mCherry; 2-way RM ANOVA; baseline food: interaction  $F(8,104) = 0.3734$ ;  $p = 0.9325$ ; post 24-h fast: interaction  $F(8,104) = 0.2928$ ;  $p = 0.9670$ ). (m) Percentage Fos in Oxt<sup>PVH</sup> neurons in hM<sub>3</sub>Dq-injected vs mCherry-injected  $Oxt^{Cre/+}$  mice ( $n = 7$  hM<sub>3</sub>Dq, 8 mCherry; unpaired 2-tailed Student's t-test;  $t(13) = 12.50$ ;  $p < 0.0001$ ). Data are expressed as mean  $\pm$  s.e.m. \*\*\*\* $p < 0.0001$ ; \* $p < 0.05$ . See Supplementary Information for statistical analyses.

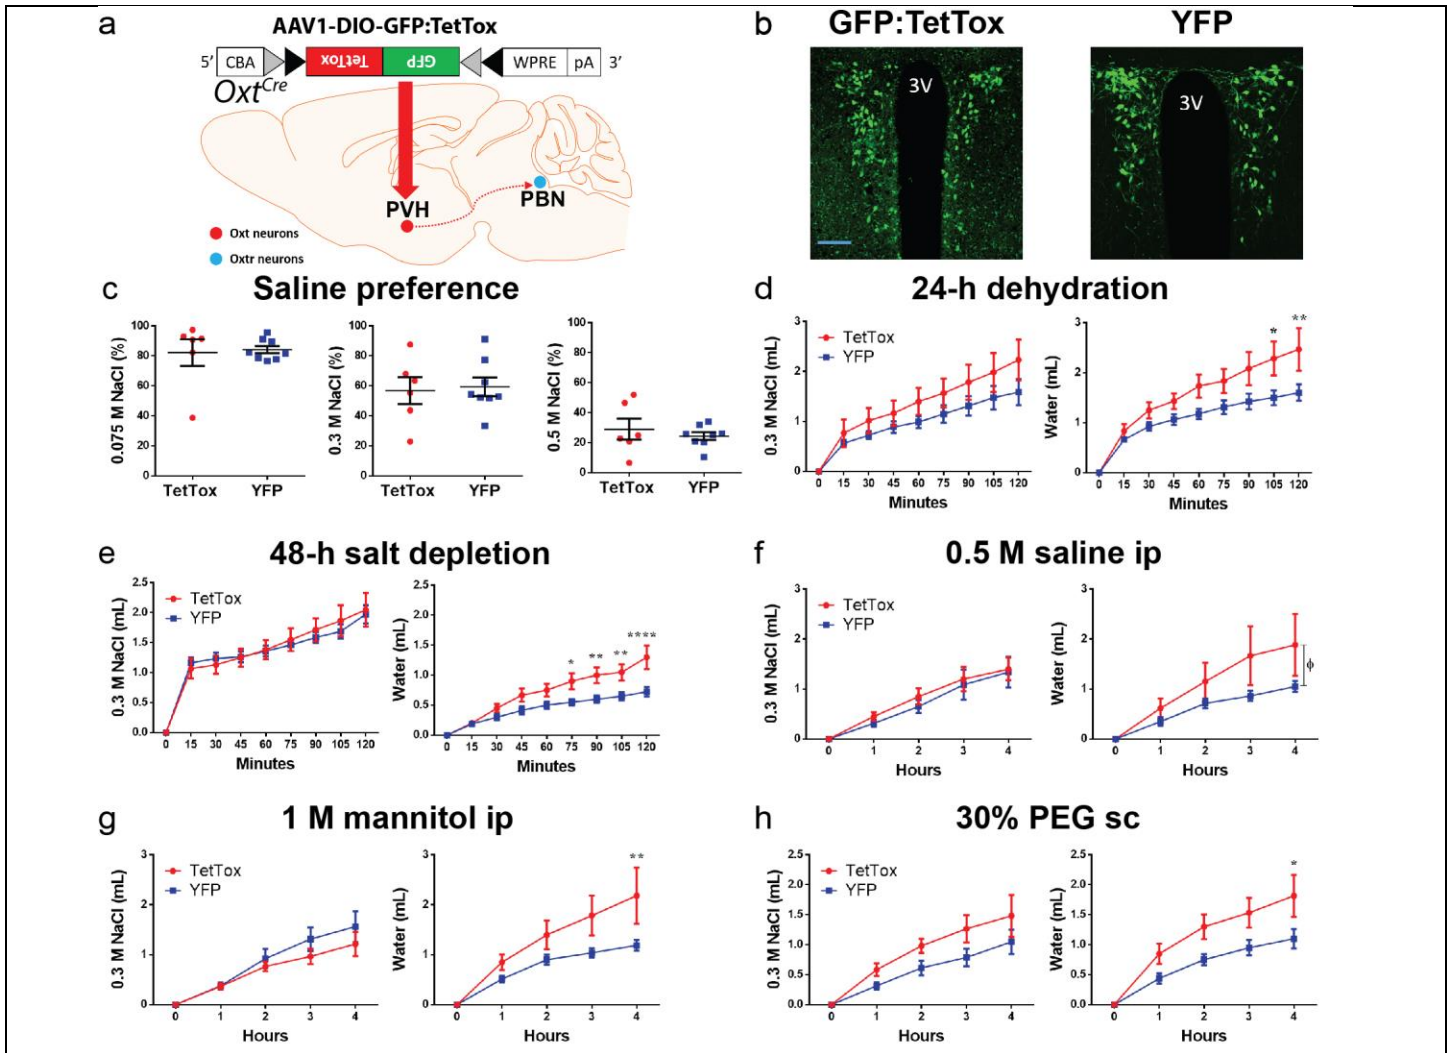

Supplementary Figure 8

Chronic Oxt<sup>PVH</sup> inactivation increases water intake following dehydration, salt depletion, mannitol and PEG.

(a) Injection of AAV-DIO-GFP:TetTox in Oxt<sup>PVH</sup> neurons. (b), Representative images of GFP expression in Oxt<sup>PVH</sup> neurons in GFP:TetTox- vs control YFP-injected mice; 3V, third ventricle; ( $n = 6$  TetTox, 8 YFP) scale bar 100  $\mu$ m. (c) Chronic Oxt<sup>PVH</sup> inactivation does not significantly alter baseline saline preference at different concentrations (0.075, 0.3, 0.5 M) ( $n = 6$  TetTox, 8 YFP; unpaired 2-tailed Student's  $t$ -test; 0.075 M NaCl: interaction  $t(12) = 0.2346$ ;  $p = 0.8184$ ; 0.3 M NaCl: interaction  $t(12) = 0.2509$ ;  $p = 0.8061$ ; 0.5 M NaCl: interaction  $t(12) = 0.6848$ ;  $p = 0.5065$ ), but (d) but significantly increases water following 24-h dehydration ( $n = 6$  TetTox, 8 YFP; 2-way RM ANOVA; NaCl: interaction  $F(8,96) = 1.098$ ;  $p = 0.3712$ ; water: interaction  $F(8,96) = 4.073$ ;  $p = 0.0003$ ), (e) 48-h salt depletion ( $n = 6$  TetTox, 8 YFP; 2-way RM ANOVA; NaCl: interaction  $F(8,96) = 0.7341$ ;  $p = 0.6612$ ; water: interaction  $F(8,96) = 6.866$ ;  $p < 0.0001$ ), (f) demonstrates a trend to increase water following 0.5 M saline ip ( $n = 6$  TetTox, 8 YFP; 2-way RM ANOVA; NaCl: interaction  $F(4,48) = 0.1292$ ;  $p = 0.9711$ ; water: interaction  $F(4,48) = 2.183$ ;  $p = 0.0850$ ), and (g) increases water following 1 M mannitol ip ( $n = 6$  TetTox, 8 YFP; 2-way RM ANOVA; NaCl: interaction  $F(4,48) = 0.8378$ ;  $p = 0.5080$ ; water: interaction  $F(4,48) = 3.628$ ;  $p = 0.0116$ ), and (h) and 30% PEG sc ( $n = 6$  TetTox, 8 YFP; 2-way RM ANOVA; NaCl: interaction  $F(4,48) = 1.296$ ;  $p = 0.2848$ ; water: interaction  $F(4,48) = 3.617$ ;  $p = 0.0118$ ). Data are expressed as mean  $\pm$  s.e.m. \*\*\*\* $p < 0.0001$ ; \*\* $p < 0.01$ ; \* $p < 0.05$ ;  $\phi$   $p = 0.085$ . See Supplementary Information for statistical analyses.

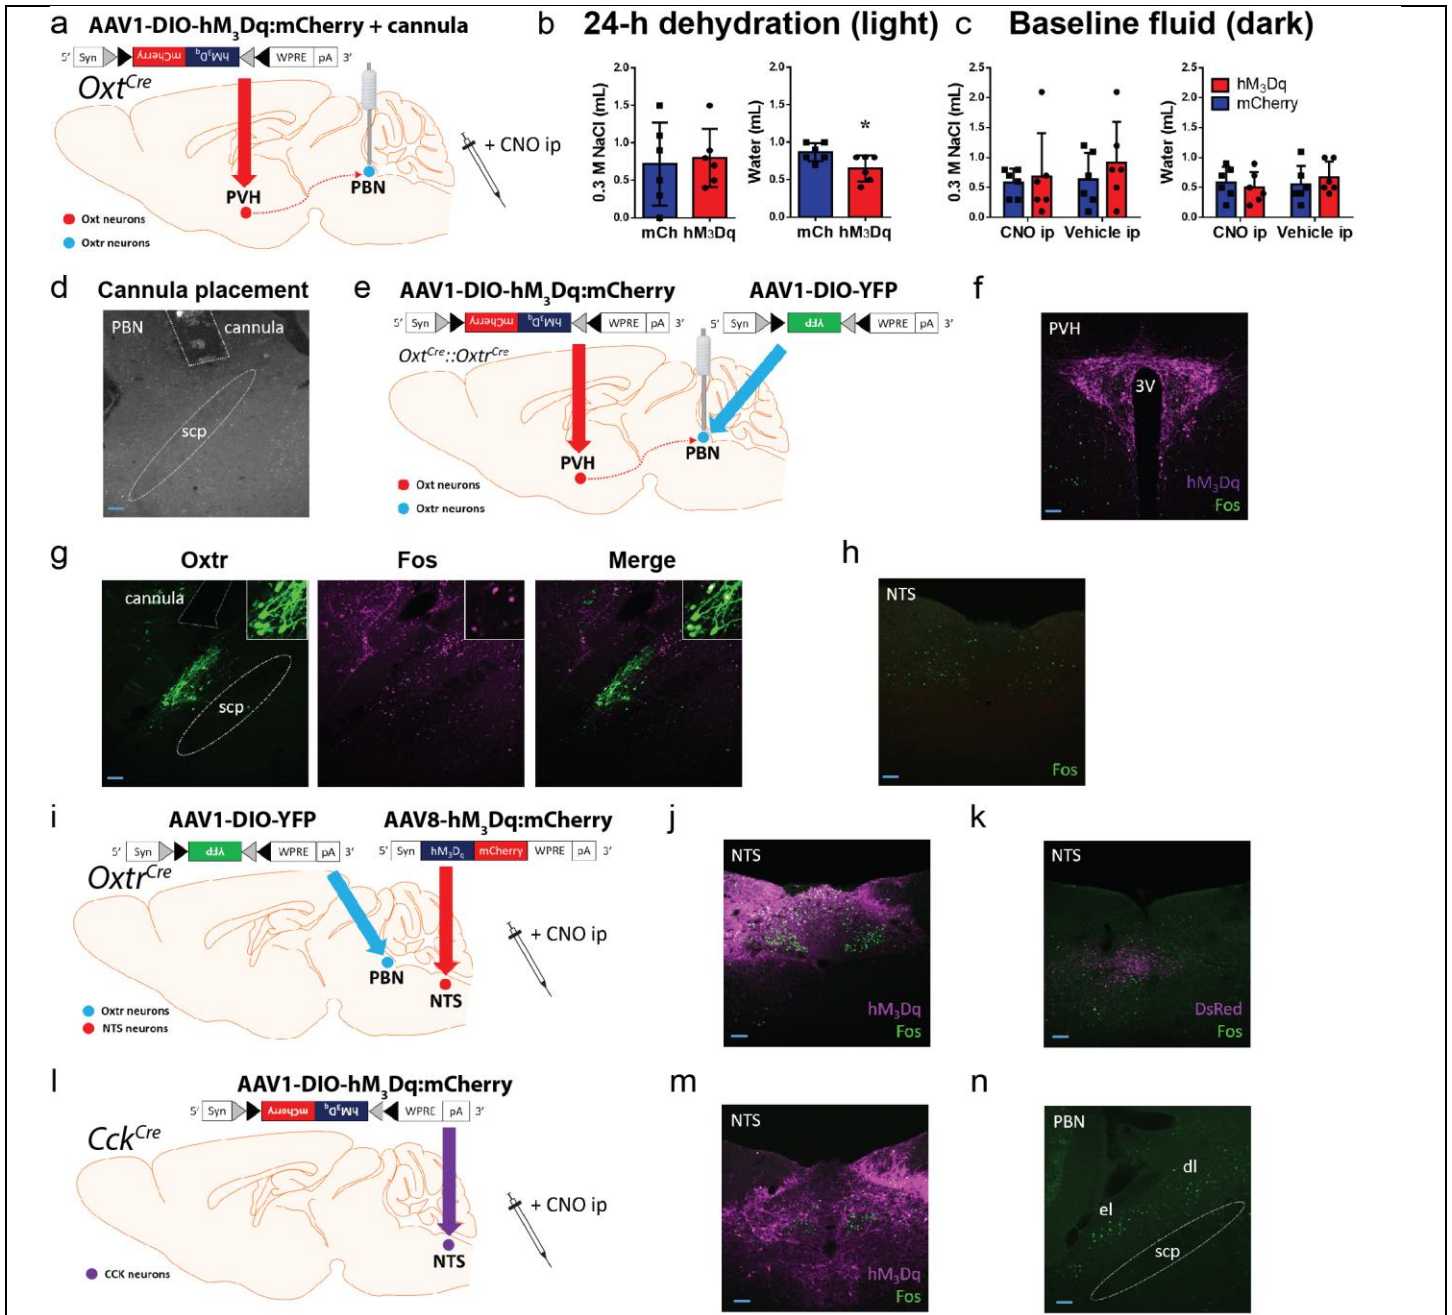

## Supplementary Figure 9

### Characterization of upstream projections to Oxt<sup>PBN</sup> neurons.

(a) Injection of AAV1-DIO-hM<sub>3</sub>Dq:mCherry in Oxt<sup>PVH</sup> neurons of Oxt<sup>Cre/+</sup> mice and bilateral cannula into PBN. (b) Acute Oxt<sup>PVH</sup> activation by CNO ip decreases 2-h water consumption after 24-h dehydration during the light cycle ( $n = 6/\text{group}$ ; unpaired 2-tailed Student's  $t$ -test; NaCl: interaction  $t(10) = 0.3017$ ;  $p = 0.7690$ ; water: interaction  $t(10) = 2.484$ ;  $p = 0.0323$ ), but (c) demonstrates no significant change in 2-h NaCl or water consumption at baseline ( $n = 6/\text{group}$ ; 2-way RM ANOVA; NaCl: interaction  $F(1,10) = 0.9098$ ;  $p = 0.3627$ ; water: interaction  $F(1,10) = 2.118$ ;  $p = 0.1763$ ). (d) Representative histological image demonstrating cannula placement in PBN ( $n = 6/\text{group}$ ). (e) Injection of AAV1-DIO-hM<sub>3</sub>Dq:mCherry in Oxt<sup>PVH</sup> neurons and AAV1-DIO-YFP in Oxt<sup>PBN</sup> neurons of Oxt<sup>Cre/+</sup>:Oxt<sup>Cre/+</sup> mice and bilateral cannula into PBN. (f) Following intra-PBN CNO, we saw some Fos expression in Oxt<sup>PVH</sup> neurons, (g) in Oxt<sup>PBN</sup> neurons, and (h) some scattered Fos in the NTS ( $n = 3$ ). (i) Injection of AAV-hM<sub>3</sub>Dq:mCherry in NTS and AAV-DIO-YFP in Oxt<sup>PBN</sup> neurons of Oxt<sup>Cre/+</sup> mice. (j) Following CNO ip, we observed robust Fos expression in hM<sub>3</sub>Dq-expressing NTS neurons ( $n = 6$ ) and (k) minimal Fos

expression in control DsRed-expressing NTS neurons ( $n = 5$ ). (l) Injection of AAV-DIO-hM<sub>3</sub>Dq:mCherry in CCK<sup>NTS</sup> neurons of *Cck<sup>Cre/4</sup>* mice. **m,n**, Following CNO ip, we observed Fos in the (**m**) NTS and (**n**) PBN of hM<sub>3</sub>Dq-injected mice ( $n = 5$  hM<sub>3</sub>Dq, 4 mCherry). Data are expressed as mean  $\pm$  s.e.m. dl, dorsolateral PBN; el, external lateral PBN; scp, superior cerebellar peduncle. \* $p < 0.05$ . Scale bars, 100  $\mu$ m. See Supplementary Information for statistical analyses.

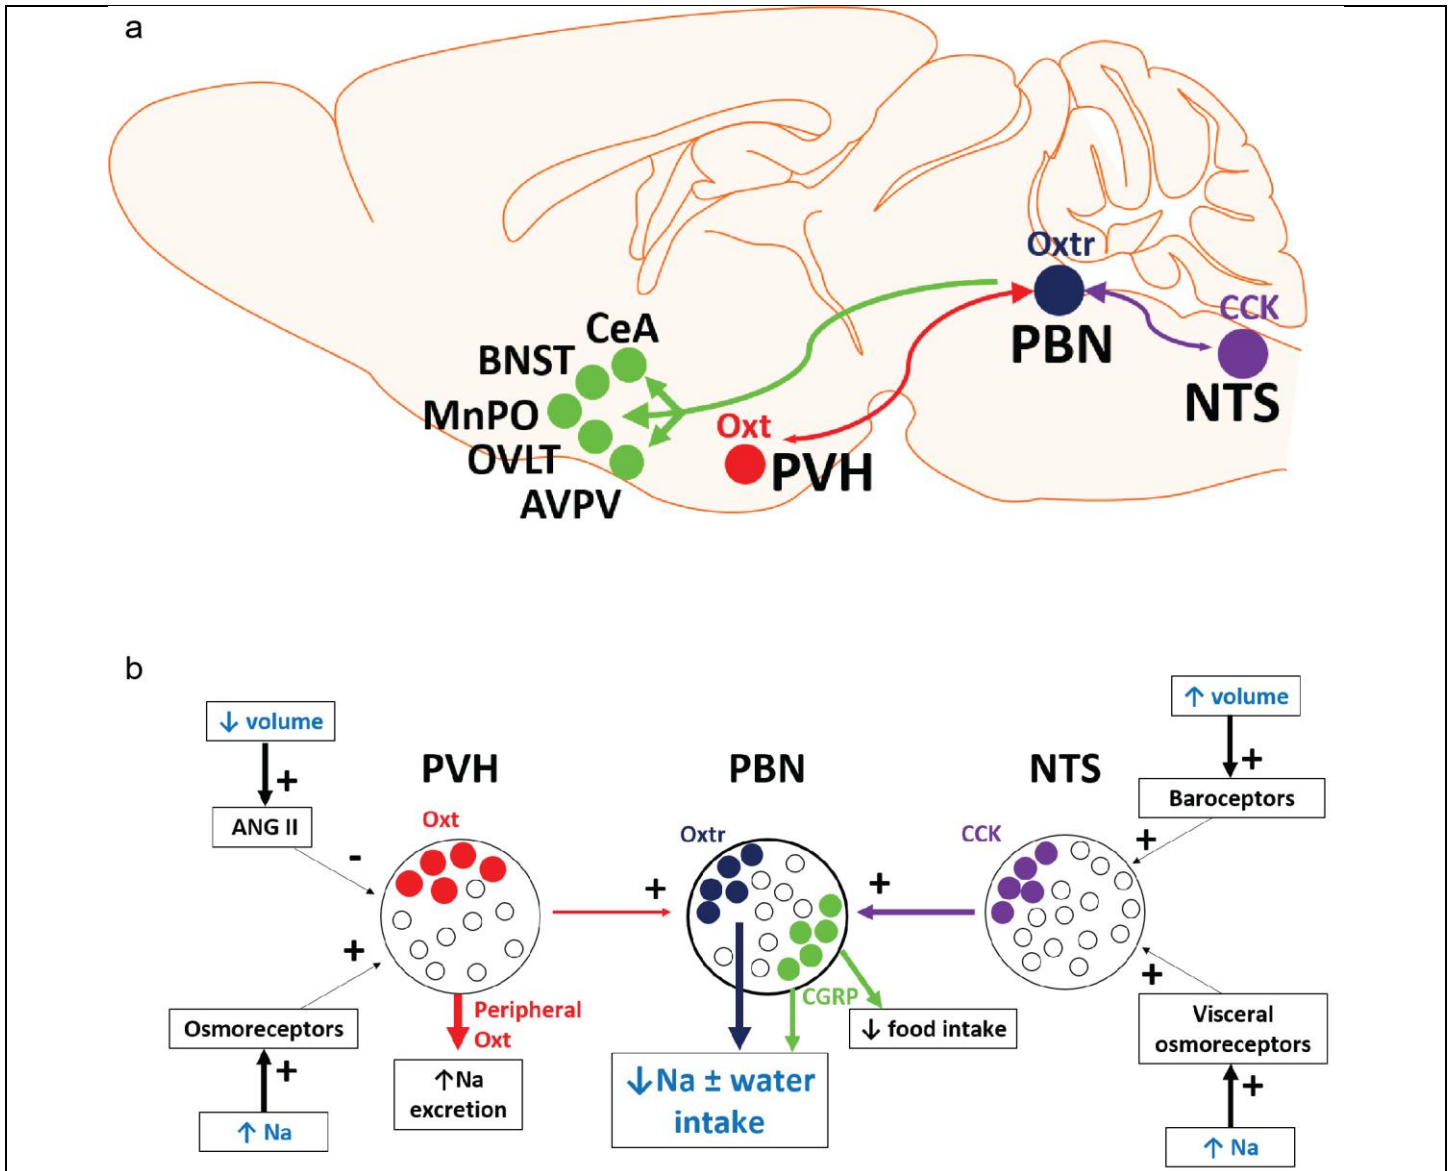

Supplementary Figure 10

**Model of neural circuits that suppress fluid intake.**

(a) Model of Oxtr<sup>PBN</sup> neural circuitry illustrating Oxt<sup>PVH</sup> projections to Oxtr<sup>PBN</sup> neurons, likely projections from CCK<sup>NTS</sup> neurons to Oxtr<sup>PBN</sup> neurons, and major Oxtr<sup>PBN</sup> projections to CeA, BNST, OVL, AVPV and MnPO. (b) Oxtr<sup>PBN</sup> neurons are proposed to decrease or prevent hypernatremia  $\pm$  hypervolemia by decreasing NaCl  $\pm$  water intake. Inputs to Oxtr<sup>PBN</sup> neurons arise from Oxt<sup>PVH</sup> and NTS neurons. NTS neurons receive signals about volume and osmolarity status from peripheral baroreceptors and visceral osmoreceptors (and likely from oropharyngeal and upper gastrointestinal receptors); while Oxt<sup>PVH</sup> neurons receive signals from forebrain osmoreceptors and angiotensin II (ANG II). Oxt<sup>PVH</sup> neurons project to PBN and can also release oxytocin peripherally to increase renal NaCl excretion. NTS neurons likely project to both Oxtr<sup>PBN</sup> and CGRP<sup>PBN</sup> neurons, which can decrease NaCl, water and food intake.

| Neuronal subtype          | n                                    | 2-h NaCl | 2-h water | 2-h total fluid | 4-h NaCl | 4-h water | 4-h total fluid |
|---------------------------|--------------------------------------|----------|-----------|-----------------|----------|-----------|-----------------|
| <b>Oxtr<sup>PBN</sup></b> | hM <sub>3</sub> Dq = 7;<br>mCh = 7   | 35%      | 25%       | 29%             | 45%      | 39%       | 41%             |
| <b>Oxt<sup>PVH</sup></b>  | hM <sub>3</sub> Dq = 8;<br>mCh = 7   | n.s.     | 73%       | n.s.            | n.s.     | 71%       | 81%             |
| <b>CGRP<sup>PBN</sup></b> | hM <sub>3</sub> Dq = 8;<br>mCh = 7   | n.s.     | 34%       | 56%             | n.s.     | 39%       | 67%             |
| <b>CCK<sup>NTS</sup></b>  | hM <sub>3</sub> Dq = 5;<br>mCh = 4   | 61%      | 51%       | 55%             | 63%      | 51%       | 53%             |
| <b>NTS</b>                | hM <sub>3</sub> Dq = 6;<br>DsRed = 5 | 14%      | 11%       | 12%             | 13%      | 16%       | 14%             |

n.s., not significant; mCh, mCherry.

#### Supplementary Table 1

##### Average percentage fluid intake after stimulating different neuronal populations.

Average percentage fluid intake after chemogenetic activation of different neuronal populations, demonstrating a range of effects on fluid consumption. Results show the percentage of fluid intake of hM<sub>3</sub>Dq-injected mice compared to control (mCherry/DsRed-injected) mice after 24-h dehydration at 2-h and 4-h timepoints.



**Supplementary Table 2**

**Supplementary Statistics**

Summary of statistical analyses from each figure, including test used, *n*, P value, degrees of freedom and post hoc multiple comparisons test.

| Figure number | Test used                                                          | n   | Litters                            | Descriptive stats         | P value    | Degrees of freedom & F/t/r/etc value | Post hoc multiple comparisons test                                                                                                                                             |
|---------------|--------------------------------------------------------------------|-----|------------------------------------|---------------------------|------------|--------------------------------------|--------------------------------------------------------------------------------------------------------------------------------------------------------------------------------|
| 1e panel 1    | two-way RM ANOVA                                                   | 7,7 | mice from at least 2 litters/group | Error bars are mean ± SEM | P = 0.9678 | F(8,96) = 2.901                      |                                                                                                                                                                                |
| 1e panel 2    | two-way RM ANOVA                                                   | 7,7 | mice from at least 2 litters/group | Error bars are mean ± SEM | P = 0.3424 | F(8,96) = 0.3424                     |                                                                                                                                                                                |
| 1f panel 1    | two-way RM ANOVA and Sidak's multiple comparisons test             | 7,7 | mice from at least 2 litters/group | Error bars are mean ± SEM | P < 0.0001 | F(8,96) = 12.63                      | 15 min: P = 0.0271<br>30 min: P = 0.0094<br>45 min: P = 0.0005<br>60 min: P = 0.0002<br>75 min: P < 0.0001<br>90 min: P < 0.0001<br>105 min: P < 0.0001<br>120 min: P < 0.0001 |
| 1f panel 2    | two-way RM ANOVA and Sidak's multiple comparisons test             | 7,7 | mice from at least 2 litters/group | Error bars are mean ± SEM | P < 0.0001 | F(8,96) = 39.75                      | 15 min: P < 0.0001<br>30 min: P < 0.0001<br>45 min: P < 0.0001<br>60 min: P < 0.0001<br>75 min: P < 0.0001<br>90 min: P < 0.0001<br>105 min: P < 0.0001<br>120 min: P < 0.0001 |
| 1g panel 1    | two-way RM ANOVA and Sidak's multiple comparisons test             | 6,6 | mice from at least 2 litters/group | Error bars are mean ± SEM | P < 0.0001 | F(8,80) = 8.173                      | 30 min: P = 0.0494<br>45 min: P = 0.0222<br>60 min: P = 0.0020<br>75 min: P = 0.0052<br>90 min: P = 0.0020<br>105 min: P = 0.0011<br>120 min: P = 0.0015                       |
| 1g panel 2    | two-way RM ANOVA and Sidak's multiple comparisons test             | 6,6 | mice from at least 2 litters/group | Error bars are mean ± SEM | P < 0.0001 | F(8,80) = 22.31                      | 15 min: P = 0.0004<br>30 min: P < 0.0001<br>45 min: P < 0.0001<br>60 min: P < 0.0001<br>75 min: P < 0.0001<br>90 min: P < 0.0001<br>105 min: P < 0.0001<br>120 min: P < 0.0001 |
| 1h panel 1    | three-way mixed design ANOVA (with Greenhouse-Geisser correction). | 7,7 | mice from at least 2 litters/group | Error bars are mean ± SEM | P = 0.210  | F(2.875,34.501) = 1.593              |                                                                                                                                                                                |

|            |                                                                                                                                                                                                                                                |     |                                    |                               |                                                                                                                |                                                                                                                                         |                                                                                                                                                                                         |
|------------|------------------------------------------------------------------------------------------------------------------------------------------------------------------------------------------------------------------------------------------------|-----|------------------------------------|-------------------------------|----------------------------------------------------------------------------------------------------------------|-----------------------------------------------------------------------------------------------------------------------------------------|-----------------------------------------------------------------------------------------------------------------------------------------------------------------------------------------|
| 1h panel 2 | three-way mixed design ANOVA (with Greenhouse-Geisser correction).<br>To investigate simple 2-way interactions, statistical significance was accepted at Bonferroni-adjusted alpha level of 0.025. Sidak's multiple comparisons test was used. | 7,7 | mice from at least 2 litters/group | Error bars are mean $\pm$ SEM | P = 0.021<br><br>2-way interactions:<br>For hM <sub>3</sub> Dq:<br>P < 0.0001<br><br>For mCherry:<br>P = 0.524 | F(2,099,25.183) = 4.464<br><br>2-way interactions:<br>For hM <sub>3</sub> Dq:<br>F(8,48) = 8.303<br><br>For mCherry:<br>F(8,48) = 0.900 | Post hoc tests for hM <sub>3</sub> Dq-injected mice:<br>CNO vs vehicle:<br>60 min: P = 0.0099<br>75 min: P < 0.0001<br>90 min: P < 0.0001<br>105 min: P < 0.0001<br>120 min: P < 0.0001 |
| 1i panel 1 | two-way RM ANOVA                                                                                                                                                                                                                               | 6,7 | mice from at least 2 litters/group | Error bars are mean $\pm$ SEM | P = 0.9282                                                                                                     | F(8,88) = 0.3809                                                                                                                        |                                                                                                                                                                                         |
| 1i panel 2 | two-way RM ANOVA                                                                                                                                                                                                                               | 6,7 | mice from at least 2 litters/group | Error bars are mean $\pm$ SEM | P = 0.8505                                                                                                     | F(8,88) = 0.5037                                                                                                                        |                                                                                                                                                                                         |
| 2a         | two-way RM ANOVA and Sidak's multiple comparisons test                                                                                                                                                                                         | 6,7 | mice from at least 2 litters/group | Error bars are mean $\pm$ SEM | P = 0.0002                                                                                                     | F(4,44) = 7.143                                                                                                                         | 2h: P = 0.0047<br>3h: P = 0.0037<br>4h: P = 0.0011                                                                                                                                      |
| 2b panel 1 | two-way RM ANOVA                                                                                                                                                                                                                               | 7,7 | mice from at least 2 litters/group | Error bars are mean $\pm$ SEM | P = 0.2028                                                                                                     | F(8,96) = 1.408                                                                                                                         |                                                                                                                                                                                         |
| 2b panel 2 | two-way RM ANOVA and Sidak's multiple comparisons test                                                                                                                                                                                         | 7,7 | mice from at least 2 litters/group | Error bars are mean $\pm$ SEM | P < 0.0001                                                                                                     | F(8,96) = 35.57                                                                                                                         | 30 min: P = 0.0051<br>45 min: P < 0.0001<br>60 min: P < 0.0001<br>75 min: P < 0.0001<br>90 min: P < 0.0001<br>105 min: P < 0.0001<br>120 min: P < 0.0001                                |
| 2c panel 1 | two-way RM ANOVA                                                                                                                                                                                                                               | 7,7 | mice from at least 2 litters/group | Error bars are mean $\pm$ SEM | P = 0.9853                                                                                                     | F(4,48) = 0.08955                                                                                                                       |                                                                                                                                                                                         |
| 2c panel 2 | two-way RM ANOVA and Sidak's multiple comparisons test                                                                                                                                                                                         | 7,7 | mice from at least 2 litters/group | Error bars are mean $\pm$ SEM | P < 0.0001                                                                                                     | F(4,48) = 11.37                                                                                                                         | 3 h: P = 0.0003<br>4 h: P < 0.0001                                                                                                                                                      |
| 2d panel 1 | two-way RM ANOVA and Sidak's multiple comparisons test                                                                                                                                                                                         | 7,7 | mice from at least 2 litters/group | Error bars are mean $\pm$ SEM | P = 0.0114                                                                                                     | F(4,48) = 3.638                                                                                                                         | 4 h: P = 0.0118                                                                                                                                                                         |
| 2d panel 2 | two-way RM ANOVA and Sidak's multiple comparisons test                                                                                                                                                                                         | 7,7 | mice from at least 2 litters/group | Error bars are mean $\pm$ SEM | P < 0.0001                                                                                                     | F(4,48) = 24.56                                                                                                                         | 1 h: P = 0.0049<br>2 h: P < 0.0001<br>3 h: P < 0.0001<br>4 h: P < 0.0001                                                                                                                |
| 2e panel 1 | two-way RM ANOVA                                                                                                                                                                                                                               | 6,7 | mice from at least 2 litters/group | Error bars are mean $\pm$ SEM | P = 0.8046                                                                                                     | F(4,44) = 0.4042                                                                                                                        |                                                                                                                                                                                         |

|            |                                                                                                                                                                                                                                                |       |                                    |                               |                                                                                                                 |                                                                                                                                           |                                                                                                                                                                                                                                     |
|------------|------------------------------------------------------------------------------------------------------------------------------------------------------------------------------------------------------------------------------------------------|-------|------------------------------------|-------------------------------|-----------------------------------------------------------------------------------------------------------------|-------------------------------------------------------------------------------------------------------------------------------------------|-------------------------------------------------------------------------------------------------------------------------------------------------------------------------------------------------------------------------------------|
| 2e panel 2 | two-way RM ANOVA and Sidak's multiple comparisons test                                                                                                                                                                                         | 6,7   | mice from at least 2 litters/group | Error bars are mean $\pm$ SEM | P < 0.0001                                                                                                      | F(4,44) = 11.54                                                                                                                           | 2 h: P = 0.0037<br>3 h: P < 0.0001<br>4 h: P < 0.0001                                                                                                                                                                               |
| 3b panel 1 | two-way RM ANOVA and Sidak's multiple comparisons test                                                                                                                                                                                         | 6,7   | mice from at least 2 litters/group | Error bars are mean $\pm$ SEM | P = 0.0009                                                                                                      | F(4,44) = 5.704                                                                                                                           | 3 h: P = 0.0167<br>4 h: P = 0.0139                                                                                                                                                                                                  |
| 3b panel 2 | two-way RM ANOVA                                                                                                                                                                                                                               | 6,7   | mice from at least 2 litters/group | Error bars are mean $\pm$ SEM | P = 0.5342                                                                                                      | F(4,44) = 0.7961                                                                                                                          |                                                                                                                                                                                                                                     |
| 3c panel 1 | two-way RM ANOVA and Sidak's multiple comparisons test                                                                                                                                                                                         | 6,7   | mice from at least 2 litters/group | Error bars are mean $\pm$ SEM | P = 0.0011                                                                                                      | F(4,44) = 5.497                                                                                                                           | 3 h: P = 0.0079<br>4 h: P = 0.0014                                                                                                                                                                                                  |
| 3c panel 2 | two-way RM ANOVA                                                                                                                                                                                                                               | 6,7   | mice from at least 2 litters/group | Error bars are mean $\pm$ SEM | P = 0.9693                                                                                                      | F(4,44) = 0.1334                                                                                                                          |                                                                                                                                                                                                                                     |
| 3d panel 1 | two-way RM ANOVA                                                                                                                                                                                                                               | 6,7   | mice from at least 2 litters/group | Error bars are mean $\pm$ SEM | P = 0.9100                                                                                                      | F(8,88) = 0.4136                                                                                                                          |                                                                                                                                                                                                                                     |
| 3d panel 2 | two-way RM ANOVA                                                                                                                                                                                                                               | 6,7   | mice from at least 2 litters/group | Error bars are mean $\pm$ SEM | P = 0.5230                                                                                                      | F(8,88) = 0.8966                                                                                                                          |                                                                                                                                                                                                                                     |
| 3f panel 1 | three-way mixed design ANOVA (with Greenhouse-Geisser correction).<br>To investigate simple 2-way interactions, statistical significance was accepted at Bonferroni-adjusted alpha level of 0.025. Sidak's multiple comparisons test was used. | 5,6   | mice from at least 2 litters/group | Error bars are mean $\pm$ SEM | P = 0.018<br><br>2-way interactions:<br>For hM <sub>4</sub> Di:<br>P < 0.0001<br><br>For mCherry:<br>P = 0.7775 | F(2.644, 23.797) = 4.305<br><br>2-way interactions:<br>For hM <sub>4</sub> Di:<br>F(8,32) = 6.213<br><br>For mCherry:<br>F(8,40) = 0.5932 | Post hoc tests for hM <sub>4</sub> Di-injected mice:<br>CNO vs vehicle:<br>30 min: P = 0.0002<br>45 min: P < 0.0001<br>60 min: P < 0.0001<br>75 min: P < 0.0001<br>90 min: P < 0.0001<br>105 min: P < 0.0001<br>120 min: P < 0.0001 |
| 3f panel 2 | three-way mixed design ANOVA (with Greenhouse-Geisser correction).                                                                                                                                                                             | 5,6   | mice from at least 2 litters/group | Error bars are mean $\pm$ SEM | P = 0.436                                                                                                       | F(1.451, 13.062) = 0.790                                                                                                                  |                                                                                                                                                                                                                                     |
| 4b         | one-way ANOVA and Tukey's multiple comparisons test.                                                                                                                                                                                           | 4,3,3 | mice from 1 litter                 | Error bars are mean $\pm$ SEM | P = 0.0063                                                                                                      | F(2,7) = 11.41                                                                                                                            | Salt returned vs Salt depleted:<br>P = 0.0180<br>Salt returned vs Control:<br>P = 0.0086                                                                                                                                            |
| 4c         | one-way ANOVA and Tukey's multiple comparisons test.                                                                                                                                                                                           | 4,3,3 | mice from 1 litter                 | Error bars are mean $\pm$ SEM | P = 0.0006                                                                                                      | F(2,7) = 26.02                                                                                                                            | Salt returned vs Salt depleted:<br>P = 0.0025<br>Salt returned vs Control:<br>P = 0.0007                                                                                                                                            |

|            |                                                                                                                                                                                                                                                |            |                                    |                               |                                                                                                                |                                                                                                                                          |                                                                                                                                                                                                                                                                                                                                                                                                                  |
|------------|------------------------------------------------------------------------------------------------------------------------------------------------------------------------------------------------------------------------------------------------|------------|------------------------------------|-------------------------------|----------------------------------------------------------------------------------------------------------------|------------------------------------------------------------------------------------------------------------------------------------------|------------------------------------------------------------------------------------------------------------------------------------------------------------------------------------------------------------------------------------------------------------------------------------------------------------------------------------------------------------------------------------------------------------------|
| 4d         | unpaired two-tailed Student's t-test                                                                                                                                                                                                           | 4,3        | mice from 1 litter                 | Error bars are mean $\pm$ SEM | P = 0.0078                                                                                                     | t(5) = 4.285                                                                                                                             |                                                                                                                                                                                                                                                                                                                                                                                                                  |
| 4e         | unpaired two-tailed Student's t-test                                                                                                                                                                                                           | 4,3        | mice from 1 litter                 | Error bars are mean $\pm$ SEM | P = 0.0186                                                                                                     | t(5) = 3.430                                                                                                                             |                                                                                                                                                                                                                                                                                                                                                                                                                  |
| 4f         | unpaired two-tailed Student's t-test                                                                                                                                                                                                           | 4,3        | mice from 2 litters                | Error bars are mean $\pm$ SEM | P = 0.0100                                                                                                     | t(5) = 4.033                                                                                                                             |                                                                                                                                                                                                                                                                                                                                                                                                                  |
| 4g         | unpaired two-tailed Student's t-test                                                                                                                                                                                                           | 4,3        | mice from 2 litters                | Error bars are mean $\pm$ SEM | P = 0.2341                                                                                                     | t(5) = 1.353                                                                                                                             |                                                                                                                                                                                                                                                                                                                                                                                                                  |
| 4m         | two-way RM ANOVA and Sidak's multiple comparisons test                                                                                                                                                                                         | 94, 85, 80 | mice from 2 litters                | Error bars are mean $\pm$ SEM | P < 0.0001                                                                                                     | F(2,257) = 17.01                                                                                                                         | For Water:<br>before vs after bout:<br>P < 0.0001                                                                                                                                                                                                                                                                                                                                                                |
| 4n         | one-way RM ANOVA and Tukey's multiple comparisons test                                                                                                                                                                                         | 83         | mice from 1 litters                | Error bars are mean $\pm$ SEM | P < 0.0001                                                                                                     | F(8,656) = 134.7                                                                                                                         | 5 vs 10: P < 0.0001<br>5 vs 15: P < 0.0001<br>5 vs 20: P < 0.0001<br>5 vs 25: P < 0.0001<br>5 vs 30: P < 0.0001<br>5 vs 45: P < 0.0001<br>5 vs 60: P < 0.0001<br>5 vs 120: P < 0.0001<br>10 vs 15: P < 0.0001<br>10 vs 20: P < 0.0001<br>10 vs 25: P < 0.0001<br>10 vs 30: P < 0.0001<br>10 vs 45: P < 0.0001<br>10 vs 60: P < 0.0001<br>10 vs 120: P < 0.0001<br>15 vs 120: P = 0.0126<br>60 vs 120: P = 0.0376 |
| 5c panel 1 | three-way mixed design ANOVA (with Greenhouse-Geisser correction).                                                                                                                                                                             | 8,7        | mice from at least 2 litters/group | Error bars are mean $\pm$ SEM | P = 0.406                                                                                                      | F(1.876, 24.391) = 0.921                                                                                                                 |                                                                                                                                                                                                                                                                                                                                                                                                                  |
| 5c panel 2 | three-way mixed design ANOVA (with Greenhouse-Geisser correction).<br>To investigate simple 2-way interactions, statistical significance was accepted at Bonferroni-adjusted alpha level of 0.025. Sidak's multiple comparisons test was used. | 8,7        | mice from at least 2 litters/group | Error bars are mean $\pm$ SEM | P = 0.023<br><br>2-way interactions:<br>For hM <sub>3</sub> Dq:<br>P = 0.0205<br><br>For mCherry:<br>P = 0.075 | F(2.629, 34.177) = 3.768<br><br>2-way interactions:<br>For hM <sub>3</sub> Dq:<br>F(8,56) = 2.518<br><br>For mCherry:<br>F(8,56) = 1.941 | Post hoc tests for hM <sub>3</sub> Dq-injected mice:<br>CNO vs vehicle:<br>120 min: P = 0.0003                                                                                                                                                                                                                                                                                                                   |
| 5d panel 1 | two-way RM ANOVA                                                                                                                                                                                                                               | 8,7        | mice from at least 2 litters/group | Error bars are mean $\pm$ SEM | P = 0.6395                                                                                                     | F(8,104) = 0.07589                                                                                                                       |                                                                                                                                                                                                                                                                                                                                                                                                                  |

|            |                                                                    |     |                                    |                               |            |                          |                                                                                                                                                                                |
|------------|--------------------------------------------------------------------|-----|------------------------------------|-------------------------------|------------|--------------------------|--------------------------------------------------------------------------------------------------------------------------------------------------------------------------------|
| 5d panel 2 | two-way RM ANOVA and Sidak's multiple comparisons test             | 8,7 | mice from at least 2 litters/group | Error bars are mean $\pm$ SEM | P < 0.0001 | F(8,104) = 22.22         | 15 min: P = 0.0004<br>30 min: P < 0.0001<br>45 min: P < 0.0001<br>60 min: P < 0.0001<br>75 min: P < 0.0001<br>90 min: P < 0.0001<br>105 min: P < 0.0001<br>120 min: P < 0.0001 |
| 5e panel 1 | two-way RM ANOVA and Sidak's multiple comparisons test             | 8,7 | mice from at least 2 litters/group | Error bars are mean $\pm$ SEM | P < 0.0001 | F(8,104) = 5.789         | 30 min: P = 0.0477<br>45 min: P = 0.0187<br>60 min: P = 0.0064<br>75 min: P = 0.0028<br>90 min: P = 0.0002<br>105 min: P = 0.0003<br>120 min: P = 0.0011                       |
| 5e panel 2 | two-way RM ANOVA and Sidak's multiple comparisons test             | 8,7 | mice from at least 2 litters/group | Error bars are mean $\pm$ SEM | P < 0.0001 | F(8,104) = 14.01         | 45 min: P = 0.0213<br>60 min: P = 0.0005<br>75 min: P = 0.0003<br>90 min: P < 0.0001<br>105 min: P < 0.0001<br>120 min: P < 0.0001                                             |
| 7b panel 1 | three-way mixed design ANOVA (with Greenhouse-Geisser correction). | 8,7 | mice from at least 2 litters/group | Error bars are mean $\pm$ SEM | P = 0.468  | F(1,749, 22.735) = 0.748 |                                                                                                                                                                                |
| 7b panel 2 | three-way mixed design ANOVA (with Greenhouse-Geisser correction). | 8,7 | mice from at least 2 litters/group | Error bars are mean $\pm$ SEM | P = 0.305  | F(2,480, 32.236) = 1.250 |                                                                                                                                                                                |
| 7c panel 1 | two-way RM ANOVA                                                   | 8,7 | mice from at least 2 litters/group | Error bars are mean $\pm$ SEM | P = 0.9922 | F(8,104) = 0.1871        |                                                                                                                                                                                |
| 7c panel 2 | two-way RM ANOVA and Sidak's multiple comparisons test             | 8,7 | mice from at least 2 litters/group | Error bars are mean $\pm$ SEM | P = 0.0014 | F(8,104) = 3.456         | 90 min: P = 0.0256<br>105 min: P = 0.0401<br>120 min: P = 0.0136                                                                                                               |
| 7d panel 1 | two-way RM ANOVA                                                   | 8,7 | mice from at least 2 litters/group | Error bars are mean $\pm$ SEM | P = 0.1007 | F(4,52) = 2.052          |                                                                                                                                                                                |
| 7d panel 2 | two-way RM ANOVA and Sidak's multiple comparisons test             | 8,7 | mice from at least 2 litters/group | Error bars are mean $\pm$ SEM | P = 0.0006 | F(4,52) = 5.763          | 3 h: P = 0.0007<br>4 h: P = 0.0005                                                                                                                                             |
| 7f panel 1 | two-way RM ANOVA and Sidak's multiple comparisons test             | 6,8 | mice from at least 2 litters/group | Error bars are mean $\pm$ SEM | P = 0.0489 | F(8,96) = 2.046          | No significant differences in post hoc tests.                                                                                                                                  |
| 7f panel 2 | two-way RM ANOVA and Sidak's multiple comparisons test             | 6,8 | mice from at least 2 litters/group | Error bars are mean $\pm$ SEM | P < 0.0001 | F(8,96) = 5.036          | 75 min: P = 0.0346<br>90 min: P = 0.0087<br>105 min: P = 0.0063<br>120 min: P = 0.0005                                                                                         |
| 7h panel 1 | two-way RM ANOVA                                                   | 6,6 | mice from at least 2 litters/group | Error bars are mean $\pm$ SEM | P = 0.9975 | F(8,80) = 0.1334         |                                                                                                                                                                                |

|                  |                                                        |         |                                    |                               |                                                                                                             |                                                                                                                             |                                                                                                                                                          |
|------------------|--------------------------------------------------------|---------|------------------------------------|-------------------------------|-------------------------------------------------------------------------------------------------------------|-----------------------------------------------------------------------------------------------------------------------------|----------------------------------------------------------------------------------------------------------------------------------------------------------|
| 7h panel 2       | two-way RM ANOVA and Sidak's multiple comparisons test | 6,6     | mice from at least 2 litters/group | Error bars are mean $\pm$ SEM | P = 0.0444                                                                                                  | F(8,80) = 2.108                                                                                                             | No significant differences in post hoc tests.                                                                                                            |
| 8b panel 1       | two-way RM ANOVA and Sidak's multiple comparisons test | 6,5     | mice from at least 2 litters/group | Error bars are mean $\pm$ SEM | P < 0.0001                                                                                                  | F(8,72) = 11.88                                                                                                             | 45 min: P = 0.0352<br>60 min: P = 0.0046<br>75 min: P = 0.0014<br>90 min: P = 0.0014<br>105 min: P = 0.0003<br>120 min: P < 0.0001                       |
| 8b panel 2       | two-way RM ANOVA and Sidak's multiple comparisons test | 6,5     | mice from at least 2 litters/group | Error bars are mean $\pm$ SEM | P < 0.0001                                                                                                  | F(8,72) = 17.94                                                                                                             | 30 min: P = 0.0117<br>45 min: P = 0.0023<br>60 min: P = 0.0002<br>75 min: P = 0.0001<br>90 min: P < 0.0001<br>105 min: P < 0.0001<br>120 min: P < 0.0001 |
| 8c               | two-way RM ANOVA and Sidak's multiple comparisons test | 6,5     | mice from at least 2 litters/group | Error bars are mean $\pm$ SEM | P < 0.0001                                                                                                  | F(4,36) = 91.69                                                                                                             | 1 h: P < 0.0001<br>2 h: P < 0.0001<br>3 h: P < 0.0001<br>4 h: P < 0.0001                                                                                 |
| 8f panel 1       | two-way RM ANOVA and Sidak's multiple comparisons test | 5,4     | mice from at least 2 litters/group | Error bars are mean $\pm$ SEM | P = 0.0065                                                                                                  | F(8,56) = 3.047                                                                                                             | No significant differences in post hoc tests.                                                                                                            |
| 8f panel 2       | two-way RM ANOVA and Sidak's multiple comparisons test | 5,4     | mice from at least 2 litters/group | Error bars are mean $\pm$ SEM | P < 0.0001                                                                                                  | F(8,56) = 5.693                                                                                                             | 75 min: P = 0.0277<br>90 min: P = 0.0134<br>105 min: P = 0.0050<br>120 min: P = 0.0028                                                                   |
| Suppl 3a panel 1 | Unpaired 2-tailed Student's t-test                     | 7,7     | mice from at least 2 litters/group | Error bars are mean $\pm$ SEM | P = 0.5821                                                                                                  | t(12) = 0.5656                                                                                                              |                                                                                                                                                          |
| Suppl 3a panel 2 | Unpaired 2-tailed Student's t-test                     | 7,7     | mice from at least 2 litters/group | Error bars are mean $\pm$ SEM | P = 0.0394                                                                                                  | t(12) = 2.311                                                                                                               |                                                                                                                                                          |
| Suppl 3b panel 1 | two-way ANOVA and Sidak's multiple comparisons test    | 7,6,7,6 | mice from at least 2 litters/group | Error bars are mean $\pm$ SEM | Interaction: P = 0.3989<br>Main effect of virus: P < 0.0001<br>Main effect of food availability: P = 0.0024 | Interaction: F(1,22) = 0.7401<br>Main effect of virus: F(1,22) = 32.44<br>Main effect of food availability: F(1,22) = 11.77 | Food present vs Food absent:<br>For hM <sub>3</sub> Dq: P = 0.1588<br>For mCherry: P = 0.0122                                                            |
| Suppl 3b panel 2 | two-way ANOVA and Sidak's multiple comparisons test    | 7,6,7,6 | mice from at least 2 litters/group | Error bars are mean $\pm$ SEM | P = 0.0367                                                                                                  | F(1,22) = 4.946                                                                                                             | Food present vs Food absent:<br>For hM <sub>3</sub> Dq: P = 0.7499<br>For mCherry: P = 0.0018                                                            |
| Suppl 3c panel 1 | two-way RM ANOVA                                       | 7,7     | mice from at least 2 litters/group | Error bars are mean $\pm$ SEM | P = 0.2038                                                                                                  | F(1,12) = 1.806                                                                                                             |                                                                                                                                                          |
| Suppl 3c panel 2 | two-way RM ANOVA                                       | 7,7     | mice from at least 2 litters/group | Error bars are mean $\pm$ SEM | P = 0.6645                                                                                                  | F(1,12) = 0.1977                                                                                                            |                                                                                                                                                          |

|                  |                                    |     |                                    |                               |            |                  |  |
|------------------|------------------------------------|-----|------------------------------------|-------------------------------|------------|------------------|--|
| Suppl 3d panel 1 | two-way RM ANOVA                   | 6,6 | mice from at least 2 litters/group | Error bars are mean $\pm$ SEM | P = 0.3285 | F(8,80) = 1.168  |  |
| Suppl 3d panel 2 | two-way RM ANOVA                   | 6,6 | mice from at least 2 litters/group | Error bars are mean $\pm$ SEM | P = 0.4228 | F(8,80) = 1.027  |  |
| Suppl 3e panel 1 | two-way RM ANOVA                   | 6,6 | mice from at least 2 litters/group | Error bars are mean $\pm$ SEM | P = 0.3202 | F(8,80) = 1.182  |  |
| Suppl 3e panel 2 | two-way RM ANOVA                   | 6,6 | mice from at least 2 litters/group | Error bars are mean $\pm$ SEM | P = 0.2489 | F(8,80) = 1.313  |  |
| Suppl 3f panel 1 | Unpaired 2-tailed Student's t-test | 7,7 | mice from at least 2 litters/group | Error bars are mean $\pm$ SEM | P = 0.7791 | t(12) = 0.2868   |  |
| Suppl 3f panel 2 | Unpaired 2-tailed Student's t-test | 7,7 | mice from at least 2 litters/group | Error bars are mean $\pm$ SEM | P = 0.2008 | t(12) = 1.354    |  |
| Suppl 3g panel 1 | two-way RM ANOVA                   | 7,7 | mice from at least 2 litters/group | Error bars are mean $\pm$ SEM | P = 0.7275 | F(1,12) = 0.1273 |  |
| Suppl 3g panel 2 | two-way RM ANOVA                   | 7,7 | mice from at least 2 litters/group | Error bars are mean $\pm$ SEM | P = 0.0618 | F(1,12) = 4.243  |  |
| Suppl 3h         | Unpaired 2-tailed Student's t-test | 7,7 | mice from at least 2 litters/group | Error bars are mean $\pm$ SEM | P < 0.0001 | t(12) = 19.28    |  |
| Suppl 4c panel 1 | Unpaired 2-tailed Student's t-test | 6,7 | mice from at least 2 litters/group | Error bars are mean $\pm$ SEM | P = 0.6292 | t(11) = 0.4967   |  |
| Suppl 4c panel 2 | Unpaired 2-tailed Student's t-test | 6,7 | mice from at least 2 litters/group | Error bars are mean $\pm$ SEM | P = 0.3364 | t(11) = 1.005    |  |
| Suppl 4c panel 3 | Unpaired 2-tailed Student's t-test | 6,7 | mice from at least 2 litters/group | Error bars are mean $\pm$ SEM | P = 0.9224 | t(11) = 0.09961  |  |
| Suppl 4d panel 1 | two-way RM ANOVA                   | 6,7 | mice from at least 2 litters/group | Error bars are mean $\pm$ SEM | P = 0.6275 | F(8,88) = 0.7729 |  |

|                  |                                                        |     |                                    |                               |            |                  |                                               |
|------------------|--------------------------------------------------------|-----|------------------------------------|-------------------------------|------------|------------------|-----------------------------------------------|
| Suppl 4d panel 2 | two-way RM ANOVA                                       | 6,7 | mice from at least 2 litters/group | Error bars are mean $\pm$ SEM | P = 0.8728 | F(8,88) = 0.4721 |                                               |
| Suppl 4e panel 1 | Unpaired 2-tailed Student's t-test                     | 6,7 | mice from at least 2 litters/group | Error bars are mean $\pm$ SEM | P = 0.4398 | t(11) = 0.8014   |                                               |
| Suppl 4e panel 2 | Unpaired 2-tailed Student's t-test                     | 6,7 | mice from at least 2 litters/group | Error bars are mean $\pm$ SEM | P = 0.5070 | t(11) = 0.6858   |                                               |
| Suppl 4f panel 1 | Unpaired 2-tailed Student's t-test                     | 6,7 | mice from at least 2 litters/group | Error bars are mean $\pm$ SEM | P = 0.0186 | t(11) = 2.760    |                                               |
| Suppl 4f panel 2 | Unpaired 2-tailed Student's t-test                     | 6,7 | mice from at least 2 litters/group | Error bars are mean $\pm$ SEM | P = 0.3935 | t(11) = 0.8881   |                                               |
| Suppl 4g panel 1 | two-way RM ANOVA                                       | 6,7 | mice from at least 2 litters/group | Error bars are mean $\pm$ SEM | P = 0.7619 | F(4,44) = 0.4638 |                                               |
| Suppl 4g panel 2 | two-way RM ANOVA                                       | 6,7 | mice from at least 2 litters/group | Error bars are mean $\pm$ SEM | P = 0.2118 | F(4,44) = 1.524  |                                               |
| Suppl 4h panel 1 | two-way RM ANOVA                                       | 6,7 | mice from at least 2 litters/group | Error bars are mean $\pm$ SEM | P = 0.2203 | F(4,44) = 1.494  |                                               |
| Suppl 4h panel 2 | two-way RM ANOVA                                       | 6,7 | mice from at least 2 litters/group | Error bars are mean $\pm$ SEM | P = 0.8453 | F(4,44) = 0.3461 |                                               |
| Suppl 4i panel 1 | Pearson-product-moment correlation                     | 6   | mice from at least 2 litters       | Error bars are mean $\pm$ SEM | P = 0.5408 | r(4) = 0.3167    |                                               |
| Suppl 4i panel 2 | Pearson-product-moment correlation                     | 6   | mice from at least 2 litters       | Error bars are mean $\pm$ SEM | P = 0.3905 | r(4) = 0.4335    |                                               |
| Suppl 5c panel 1 | two-way RM ANOVA and Sidak's multiple comparisons test | 5,6 | mice from at least 2 litters/group | Error bars are mean $\pm$ SEM | P = 0.0064 | F(8,72) = 2.962  | No significant differences in post hoc tests. |
| Suppl 5c panel 2 | two-way RM ANOVA and Sidak's multiple comparisons test | 5,6 | mice from at least 2 litters/group | Error bars are mean $\pm$ SEM | P = 0.0304 | F(8,72) = 2.289  | 105 min: P = 0.0308                           |



|                     |                                    |       |                                    |                               |            |                  |  |
|---------------------|------------------------------------|-------|------------------------------------|-------------------------------|------------|------------------|--|
| Suppl 5d<br>panel 1 | two-way RM ANOVA                   | 5,6   | mice from at least 2 litters/group | Error bars are mean $\pm$ SEM | P = 0.9979 | F(8,72) = 0.1264 |  |
| Suppl 5d<br>panel 2 | two-way RM ANOVA                   | 5,6   | mice from at least 2 litters/group | Error bars are mean $\pm$ SEM | P = 0.7734 | F(8,72) = 0.6017 |  |
| Suppl 5e<br>panel 1 | two-way RM ANOVA                   | 5,6   | mice from at least 2 litters/group | Error bars are mean $\pm$ SEM | P = 0.9811 | F(8,72) = 0.2429 |  |
| Suppl 5e<br>panel 2 | two-way RM ANOVA                   | 5,6   | mice from at least 2 litters/group | Error bars are mean $\pm$ SEM | P = 0.4150 | F(8,72) = 1.040  |  |
| Suppl 5f<br>panel 1 | Pearson-product-moment correlation | 5     | mice from 2 litters                | Error bars are mean $\pm$ SEM | P = 0.2208 | r(3) = 0.6649    |  |
| Suppl 5f<br>panel 2 | Pearson-product-moment correlation | 5     | mice from 2 litters                | Error bars are mean $\pm$ SEM | P = 0.2013 | r(3) = -0.6857   |  |
| Suppl 6a<br>panel 1 | one-way ANOVA                      | 4,3,3 | mice from 1 litter                 | Error bars are mean $\pm$ SEM | P = 0.1331 | F(2,7) = 2.727   |  |
| Suppl 6a<br>panel 2 | one-way ANOVA                      | 4,3,3 | mice from 1 litter                 | Error bars are mean $\pm$ SEM | P = 0.7432 | F(2,7) = 0.3097  |  |
| Suppl 6b<br>panel 1 | one-way ANOVA                      | 4,3,3 | mice from 1 litter                 | Error bars are mean $\pm$ SEM | P = 0.2046 | F(2,7) = 2.008   |  |
| Suppl 6b<br>panel 2 | one-way ANOVA                      | 4,3,3 | mice from 1 litter                 | Error bars are mean $\pm$ SEM | P = 0.2711 | F(2,7) = 1.582   |  |
| Suppl 6c<br>panel 1 | Unpaired 2-tailed Student's t-test | 4,3   | mice from 1 litter                 | Error bars are mean $\pm$ SEM | P = 0.2394 | t(5) = 1.335     |  |
| Suppl 6c<br>panel 2 | Unpaired 2-tailed Student's t-test | 4,3   | mice from 1 litter                 | Error bars are mean $\pm$ SEM | P = 0.7023 | t(5) = 0.4049    |  |
| Suppl 6d<br>panel 1 | Unpaired 2-tailed Student's t-test | 4,3   | mice from 1 litter                 | Error bars are mean $\pm$ SEM | P = 0.5761 | t(5) = 0.5977    |  |

|                     |                                                              |     |                                          |                                     |            |                   |                 |
|---------------------|--------------------------------------------------------------|-----|------------------------------------------|-------------------------------------|------------|-------------------|-----------------|
| Suppl 6d<br>panel 2 | Unpaired 2-tailed<br>Student's t-test                        | 4,3 | mice from 1<br>litter                    | Error bars<br>are mean $\pm$<br>SEM | P = 0.7479 | t(5) = 0.3396     |                 |
| Suppl 6e<br>panel 1 | Unpaired 2-tailed<br>Student's t-test                        | 4,3 | mice from 2<br>litters                   | Error bars<br>are mean $\pm$<br>SEM | P = 0.6328 | t(5) = 0.5084     |                 |
| Suppl 6e<br>panel 2 | Unpaired 2-tailed<br>Student's t-test                        | 4,3 | mice from 2<br>litters                   | Error bars<br>are mean $\pm$<br>SEM | P = 0.2444 | t(5) = 1.319      |                 |
| Suppl 6f<br>panel 1 | Unpaired 2-tailed<br>Student's t-test                        | 4,3 | mice from 2<br>litters                   | Error bars<br>are mean $\pm$<br>SEM | P = 0.1469 | t(5) = 1.716      |                 |
| Suppl 6f<br>panel 2 | Unpaired 2-tailed<br>Student's t-test                        | 4,3 | mice from 2<br>litters                   | Error bars<br>are mean $\pm$<br>SEM | P = 0.0698 | t(5) = 2.300      |                 |
| Suppl 7c<br>panel 1 | Unpaired 2-tailed<br>Student's t-test                        | 3,3 | mice from 1-2<br>litters/group           | Error bars<br>are mean $\pm$<br>SEM | P = 0.0118 | t(4) = 4.385      |                 |
| Suppl 7c<br>panel 2 | Unpaired 2-tailed<br>Student's t-test                        | 3,3 | mice from 1-2<br>litters/group           | Error bars<br>are mean $\pm$<br>SEM | P = 0.1451 | t(4) = 1.807      |                 |
| Suppl 7c<br>panel 3 | Unpaired 2-tailed<br>Student's t-test                        | 3,3 | mice from 1-2<br>litters/group           | Error bars<br>are mean $\pm$<br>SEM | P = 0.0850 | t(4) = 2.278      |                 |
| Suppl 7i<br>panel 1 | two-way RM ANOVA                                             | 8,7 | mice from at<br>least 2<br>litters/group | Error bars<br>are mean $\pm$<br>SEM | P = 0.6512 | F(4,52) = 0.6187  |                 |
| Suppl 7i<br>panel 2 | two-way RM ANOVA<br>and Sidak's multiple<br>comparisons test | 8,7 | mice from at<br>least 2<br>litters/group | Error bars<br>are mean $\pm$<br>SEM | P = 0.0057 | F(4,52) = 4.120   | 4 h: P = 0.0270 |
| Suppl 7j<br>panel 1 | two-way RM ANOVA                                             | 8,7 | mice from at<br>least 2<br>litters/group | Error bars<br>are mean $\pm$<br>SEM | P = 0.3999 | F(8,104) = 1.056  |                 |
| Suppl 7j<br>panel 2 | two-way RM ANOVA                                             | 8,7 | mice from at<br>least 2<br>litters/group | Error bars<br>are mean $\pm$<br>SEM | P = 0.6941 | F(8,104) = 0.6962 |                 |
| Suppl 7k<br>panel 1 | two-way RM ANOVA                                             | 8,7 | mice from at<br>least 2<br>litters/group | Error bars<br>are mean $\pm$<br>SEM | P = 0.8589 | F(4,52) = 0.3265  |                 |

|                  |                                                        |     |                                    |                               |            |                   |                                                                                        |
|------------------|--------------------------------------------------------|-----|------------------------------------|-------------------------------|------------|-------------------|----------------------------------------------------------------------------------------|
| Suppl 7k panel 2 | two-way RM ANOVA                                       | 8,7 | mice from at least 2 litters/group | Error bars are mean $\pm$ SEM | P = 0.7191 | F(4,52) = 0.5231  |                                                                                        |
| Suppl 7l panel 1 | two-way RM ANOVA                                       | 8,7 | mice from at least 2 litters/group | Error bars are mean $\pm$ SEM | P = 0.9325 | F(8,104) = 0.3734 |                                                                                        |
| Suppl 7l panel 2 | two-way RM ANOVA                                       | 8,7 | mice from at least 2 litters/group | Error bars are mean $\pm$ SEM | P = 0.9670 | F(8,104) = 0.2928 |                                                                                        |
| Suppl 7m         | Unpaired 2-tailed Student's t-test                     | 8,7 | mice from at least 2 litters/group | Error bars are mean $\pm$ SEM | P < 0.0001 | t(13) = 12.50     |                                                                                        |
| Suppl 8c panel 1 | Unpaired 2-tailed Student's t-test                     | 6,8 | mice from at least 2 litters/group | Error bars are mean $\pm$ SEM | P = 0.8184 | t(12) = 0.2346    |                                                                                        |
| Suppl 8c panel 2 | Unpaired 2-tailed Student's t-test                     | 6,8 | mice from at least 2 litters/group | Error bars are mean $\pm$ SEM | P = 0.8061 | t(12) = 0.2509    |                                                                                        |
| Suppl 8c panel 3 | Unpaired 2-tailed Student's t-test                     | 6,8 | mice from at least 2 litters/group | Error bars are mean $\pm$ SEM | P = 0.5065 | t(12) = 0.6848    |                                                                                        |
| Suppl 8d panel 1 | two-way RM ANOVA                                       | 6,8 | mice from at least 2 litters/group | Error bars are mean $\pm$ SEM | P = 0.3712 | F(8,96) = 1.098   |                                                                                        |
| Suppl 8d panel 2 | two-way RM ANOVA and Sidak's multiple comparisons test | 6,8 | mice from at least 2 litters/group | Error bars are mean $\pm$ SEM | P = 0.0003 | F(8,96) = 4.073   | 105 min: P = 0.0250<br>120 min: P = 0.0089                                             |
| Suppl 8e panel 1 | two-way RM ANOVA                                       | 6,8 | mice from at least 2 litters/group | Error bars are mean $\pm$ SEM | P = 0.6612 | F(8,96) = 0.7341  |                                                                                        |
| Suppl 8e panel 2 | two-way RM ANOVA and Sidak's multiple comparisons test | 6,8 | mice from at least 2 litters/group | Error bars are mean $\pm$ SEM | P < 0.0001 | F(8,96) = 6.866   | 75 min: P = 0.0356<br>90 min: P = 0.0097<br>105 min: P = 0.0097<br>120 min: P < 0.0001 |
| Suppl 8f panel 1 | two-way RM ANOVA                                       | 6,8 | mice from at least 2 litters/group | Error bars are mean $\pm$ SEM | P = 0.9711 | F(4,48) = 0.1292  |                                                                                        |
| Suppl 8f panel 2 | two-way RM ANOVA                                       | 6,8 | mice from at least 2 litters/group | Error bars are mean $\pm$ SEM | P = 0.0850 | F(4,48) = 2.183   |                                                                                        |

|                     |                                                        |     |                                    |                               |            |                  |                 |
|---------------------|--------------------------------------------------------|-----|------------------------------------|-------------------------------|------------|------------------|-----------------|
| Suppl 8g<br>panel 1 | two-way RM ANOVA                                       | 6,8 | mice from at least 2 litters/group | Error bars are mean $\pm$ SEM | P = 0.5080 | F(4,48) = 0.8378 |                 |
| Suppl 8g<br>panel 2 | two-way RM ANOVA and Sidak's multiple comparisons test | 6,8 | mice from at least 2 litters/group | Error bars are mean $\pm$ SEM | P = 0.0116 | F(4,48) = 3.628  | 4 h: P = 0.0099 |
| Suppl 8h<br>panel 1 | two-way RM ANOVA                                       | 6,8 | mice from at least 2 litters/group | Error bars are mean $\pm$ SEM | P = 0.2848 | F(4,48) = 1.296  |                 |
| Suppl 8h<br>panel 2 | two-way RM ANOVA and Sidak's multiple comparisons test | 6,8 | mice from at least 2 litters/group | Error bars are mean $\pm$ SEM | P = 0.0118 | F(4,48) = 3.617  | 4 h: P = 0.0142 |
| Suppl 9b<br>panel 1 | Unpaired 2-tailed Student's t-test                     | 6,6 | mice from at least 2 litters/group | Error bars are mean $\pm$ SEM | P = 0.7690 | t(10) = 0.3017   |                 |
| Suppl 9b<br>panel 2 | Unpaired 2-tailed Student's t-test                     | 6,6 | mice from at least 2 litters/group | Error bars are mean $\pm$ SEM | P = 0.0323 | t(10) = 2.484    |                 |
| Suppl 9c<br>panel 1 | two-way RM ANOVA                                       | 6,6 | mice from at least 2 litters/group | Error bars are mean $\pm$ SEM | P = 0.3627 | F(1,10) = 0.9098 |                 |
| Suppl 9c<br>panel 2 | two-way RM ANOVA                                       | 6,6 | mice from at least 2 litters/group | Error bars are mean $\pm$ SEM | P = 0.1763 | F(1,10) = 2.118  |                 |
